# Supplementary material for: Ruthenium catalyzed transformation of levulinic acid to γ-valerolactone in water
Source: Royal Society of Chemistry journal article supplement (doi:10.1039/d3su00285c), 2023-12-01
Supplement: d3su00285c1.pdf [file d3su00285c1.pdf]

## Electronic Supplementary Information (ESI)

### Ruthenium catalyzed transformation of levulinic acid to $\gamma$ -valerolactone in water

Bhanu Priya,<sup>†</sup> Vinod K. Sahu<sup>†</sup> and Sanjay K. Singh<sup>\*</sup>

Catalysis group, Department of Chemistry, Indian Institute of Technology Indore, Simrol, Indore 453552, India.

E-mail: [sksingh@iiti.ac.in](mailto:sksingh@iiti.ac.in)

<sup>†</sup> Equal contribution

**General Information, Materials, and Instrumentation.** All reactions were performed using high purity chemicals purchased from Sigma Aldrich, TCI chemicals and Alfa Aesar. Chemicals purchased were used as received without any further purification. The <sup>1</sup>H NMR (400 MHz and 500 MHz), <sup>13</sup>C NMR (100 MHz and 125 MHz) and <sup>31</sup>P NMR (162 MHz and 202 MHz) spectra are recorded at 298 K using DMSO-*d*<sub>6</sub>, methanol-*d*<sub>4</sub>, or CDCl<sub>3</sub> as the solvent on a Bruker Advance 400 and Bruker Ascend 500 spectrometer. Tetramethylsilane (TMS) is used as an external standard and the chemical shifts in ppm are reported relative to the centre of the singlet at 3.35 and 4.78 for methanol-*d*<sub>4</sub>, 2.49 ppm for DMSO-*d*<sub>6</sub> and 7.26 for CDCl<sub>3</sub> in <sup>1</sup>H NMR and to 49.3 ppm for methanol-*d*<sub>4</sub>, 39.50 ppm for DMSO-*d*<sub>6</sub> and 77.0 for CDCl<sub>3</sub> in <sup>13</sup>C NMR. ESI (positive mode), and liquid chromatography mass spectroscopy (LCMS) are recorded on a micro-TF-Q II mass spectrometer. Single crystal was obtained by diffusion of diethyl ether into methanolic solution of the complex. Suitable single crystals of complexes **[Ru]-4**, **[Ru]-5** and **[Ru]-8** were subjected to single-crystal X-ray structural studies using CCD Agilent Technologies (Oxford Diffraction) Super NOVA diffractometer. Data are collected at 150(2) K using graphite-monochromated Mo K $\alpha$  radiation ( $\lambda = 0.71073$  Å). The strategy for the data collection

evaluated using the CrysAlisPro CCD software. The crystal and refinement data are summarized in Table 1 (in manuscript). Selected bond lengths and bond angles are summarized in Tables S1 and S2. CCDC deposition numbers of the complexes **[Ru]-4**, **[Ru]-5** and **[Ru]-8** are 1971292, 1971295 and 1971294 respectively. ICP-AES data was recorded using ARCOS, Simultaneous ICP Spectrometer, SPECTRO Analytical Instruments GmbH, Germany.

**Table S1.** Comparative chart showing literature available Ru-based catalytic systems for transformation of LA to GVL.

| Catalytic system                                                                                         | Solvent      | Additive               | H <sub>2</sub> source  | T(°C)/t(h)  | TON       | TOF (h <sup>-1</sup> ) | Conv. (%) of LA | Sel./Yield (%) of GVL     | Ref.             |
|----------------------------------------------------------------------------------------------------------|--------------|------------------------|------------------------|-------------|-----------|------------------------|-----------------|---------------------------|------------------|
| Ru(acac) <sub>3</sub> /TPPTS                                                                             | water        | -                      | 70 bar H <sub>2</sub>  | 140/12      | 600       | 50                     | >99.9           | 100/95                    | S1               |
| RuCl <sub>3</sub> /PPh <sub>3</sub>                                                                      | water        | pyridine               | HCOOH                  | 150/6       | 930       | 155                    | >99.9           | 100/93                    | S2               |
| Ru(acac) <sub>3</sub> /PPMDP                                                                             | neat         | <i>p</i> -TsOH         | 80 bar H <sub>2</sub>  | 140/168     | 75855     | 452                    | n.d.            | n.d./76                   | S3               |
| Ru(acac) <sub>3</sub> /Bu-DPPDS                                                                          | neat         | -                      | 100 bar H <sub>2</sub> | 140/1.8     | 6370      | 3540                   | >99.9           | 100/>99                   | S4               |
| [RuH <sub>2</sub> (CO) (Triphos)]                                                                        | neat         | -                      | 100 bar H <sub>2</sub> | 160/18      | 1000      | 56                     | >99.9           | 90/90                     | S5               |
| Shvo catalyst                                                                                            | neat         | -                      | HCOOH                  | 95/6        | 1065      | 177                    | >99.9           | >99/>99                   | S6               |
| [Ru( <i>p</i> -cymene)Cl (DPDP)][BArF]                                                                   | neat         | KOH                    | HCOOH                  | 120/16      | 960       | 60                     | 96              | 100/n.d.                  | S7               |
| [Ru( <i>p</i> -cymene)Cl (QMABA)]                                                                        | neat         | KOH, Et <sub>3</sub> N | HCOOH                  | 150/12      | 980       | 81.6                   | 98              | 100/n.d.                  | S8               |
| [Ru(CO <sub>3</sub> )(CO) (Triphos)]                                                                     | 1,4-dioxane  | -                      | 50 bar H <sub>2</sub>  | 130/25      | 1200      | 48                     | >99             | 60/60                     | S9               |
| [[Ru( <i>p</i> -cymene)Cl] <sub>2</sub> TEPMP][2BPh <sub>4</sub> ]                                       | neat         | Et <sub>3</sub> N      | HCOOH                  | 120/8       | 990       | 123                    | 100             | 97/n.d.                   | S10              |
| [[ $\eta^4$ -2,3,4,5-Ph <sub>4</sub> (C <sub>4</sub> CO)] Ru(CO) <sub>3</sub> ]                          | neat         | -                      | 50 bar H <sub>2</sub>  | 100/5       | 720       | 144                    | 100             | 100/99.1                  | S11              |
| <b>[<math>\eta^6</math>-<i>p</i>-cymene)RuCl (<math>\kappa^2</math>-pyNH<sup>+</sup>pr)]<sup>+</sup></b> | <b>water</b> | <b>Et<sub>3</sub>N</b> | <b>HCOOH</b>           | <b>80/2</b> | <b>40</b> | <b>20</b>              | <b>&gt;99.9</b> | <b>100/87<sup>a</sup></b> | <b>This work</b> |

TPPTS: triphenylphosphine trisulfonate, Bu-DPPDS: dibutyl(phenylphosphine)(*m*-disulphonate), PPMDP: {[(phenylphosphinediyl)bis-(1,2-phenylene)]bis(methylene)}bis-(diphenylphosphine), BArF: tetrakis[3,5-bis(trifluoromethyl)phenyl]borate, DPDP: 1-[2-[(diphenylphosphaneyl)oxy]ethyl]-3,5-dimethyl-1H-pyrazole, QMABA: 4-[(quinolin-2-ylmethylene)amino] benzoic acid, TEPMP: Tetraethyl ethane-1,2-diylbis((pyridin-2-ylmethyl)phosphoramidite),

<sup>a</sup>isolated yield, n.d. – not determined.

**Table S2.** Crystal Refinement data of complexes **[Ru]-4**, **[Ru]-5** and **[Ru]-8**.

| crystal parameter                                 | complex <b>[Ru]-4</b>                                               | complex <b>[Ru]-5</b>                                               | complex <b>[Ru]-8</b>                                               |
|---------------------------------------------------|---------------------------------------------------------------------|---------------------------------------------------------------------|---------------------------------------------------------------------|
| empirical formula                                 | C <sub>20</sub> H <sub>30</sub> ClF <sub>6</sub> N <sub>2</sub> PRu | C <sub>20</sub> H <sub>30</sub> ClF <sub>6</sub> N <sub>2</sub> PRu | C <sub>21</sub> H <sub>32</sub> ClF <sub>6</sub> N <sub>2</sub> PRu |
| formula weight                                    | 579.95                                                              | 579.95                                                              | 593.97                                                              |
| temperature (K)                                   | 293                                                                 | 293                                                                 | 298                                                                 |
| wavelength (Å)                                    | 1.54184                                                             | 1.54184                                                             | 1.54184                                                             |
| crystal system                                    | triclinic                                                           | monoclinic                                                          | orthorhombic                                                        |
| space group                                       | <i>P</i> -1                                                         | <i>P</i> 2 <sub>1</sub> / <i>c</i>                                  | <i>P</i> bca                                                        |
| crystal size (mm <sup>3</sup> )                   | 0.23 x 0.18 x 0.14                                                  | 0.22 x 0.19 x 0.17                                                  | 0.31 x 0.21 x 0.18                                                  |
| a (Å)                                             | 9.3898(7)                                                           | 10.9086(2)                                                          | 17.5759(4)                                                          |
| b (Å)                                             | 11.9327(9)                                                          | 9.2051(2)                                                           | 15.4169(2)                                                          |
| c (Å)                                             | 12.8169(7)                                                          | 24.7878(4)                                                          | 18.4534(4)                                                          |
| α (°)                                             | 100.642(6)                                                          | 90                                                                  | 90.0(1)                                                             |
| β (°)                                             | 109.691(7)                                                          | 99.912(2)                                                           | 90.0(1)                                                             |
| γ (°)                                             | 107.961(7)                                                          | 90                                                                  | 90.0(1)                                                             |
| V (Å <sup>3</sup> )                               | 1217.62(19)                                                         | 2451.91(8)                                                          | 5000.23(17)                                                         |
| Z                                                 | 2                                                                   | 4                                                                   | 8                                                                   |
| ρ (g/cm <sup>3</sup> )                            | 1.582                                                               | 1.571                                                               | 1.578                                                               |
| μ (mm <sup>-1</sup> )                             | 7.354                                                               | 7.304                                                               | 7.178                                                               |
| F (000)                                           | 588                                                                 | 1176.0                                                              | 2416.0                                                              |
| 2θ range for data collection (°)                  | 7.74 to 142.92                                                      | 7.24 to 143.766                                                     | 9.01 to 124.984                                                     |
| index ranges                                      | -11 ≤ h ≤ 10,<br>-14 ≤ k ≤ 11,<br>-14 ≤ l ≤ 15                      | -13 ≤ h ≤ 13,<br>-11 ≤ k ≤ 11,<br>-29 ≤ l ≤ 30                      | -19 ≤ h ≤ 20,<br>-17 ≤ k ≤ 17,<br>-21 ≤ l ≤ 16                      |
| reflections collected/<br>independent reflections | 8535/4635 [R <sub>int</sub> = 0.0888]                               | 15956/4708 [R <sub>int</sub> = 0.1181]                              | 32327/3980 [R <sub>int</sub> = 0.1484]                              |
| data/restraints/parameters                        | 4635/1/281                                                          | 4708/0/285                                                          | 3980/105/295                                                        |
| goodness-of-fit on F <sup>2</sup>                 | 1.132                                                               | 1.263                                                               | 1.088                                                               |
| final R indexes [I > 2σ (I)]                      | R <sub>1</sub> = 0.0667, wR <sub>2</sub> = 0.1520                   | R <sub>1</sub> = 0.1026, wR <sub>2</sub> = 0.2923                   | R <sub>1</sub> = 0.0680, wR <sub>2</sub> = 0.1904                   |

|                                             |                                                   |                                                   |                                                   |
|---------------------------------------------|---------------------------------------------------|---------------------------------------------------|---------------------------------------------------|
| R indexes (all data)                        | R <sub>1</sub> = 0.0776, wR <sub>2</sub> = 0.1636 | R <sub>1</sub> = 0.1159, wR <sub>2</sub> = 0.3268 | R <sub>1</sub> = 0.0827, wR <sub>2</sub> = 0.2126 |
| Largest diff. peak/hole (eÅ <sup>-3</sup> ) | 1.59/-1.22                                        | 1.80/-1.28                                        | 1.32/-1.16                                        |

**Table S3.** Important bond lengths (Å) for complex [Ru]-4, [Ru]-5, [Ru]-8.

|                                    | [Ru]-4    | [Ru]-5    | [Ru]-8    |
|------------------------------------|-----------|-----------|-----------|
| Ru-C <sub>t</sub>                  | 1.676     | 1.679     | 1.687     |
| Ru-C <sub>avg</sub>                | 2.183     | 2.195     | 2.200     |
| Ru-N <sub>py</sub>                 | 2.099(6)  | 2.089(7)  | 2.079(5)  |
| Ru-N <sub>amine</sub>              | 2.127(5)  | 2.138(7)  | 2.196(7)  |
| Ru-Cl                              | 2.406(16) | 2.398(2)  | 2.392(18) |
| N <sub>amine</sub> -C <sub>6</sub> | 1.468(8)  | 1.442(13) | 1.492(9)  |

**Table S4.** Important bond bond Angles (°) and torsion angles (°) for complex [Ru]-4, [Ru]-5, [Ru]-8.

| <b>Bond Angles (°)</b>                                              |           |           |           |
|---------------------------------------------------------------------|-----------|-----------|-----------|
|                                                                     | [Ru]-4    | [Ru]-5    | [Ru]-8    |
| N <sub>py</sub> -Ru-N <sub>amine</sub>                              | 78.1(2)   | 76.9(3)   | 76.1(2)   |
| N <sub>py</sub> -Ru-Cl                                              | 84.32(16) | 83.89(19) | 85.68(14) |
| N <sub>amine</sub> -Ru-Cl                                           | 84.60(13) | 82.8(2)   | 82.55(19) |
| N <sub>amine</sub> -Ru-C <sub>t</sub>                               | 132.35    | 133.62    | 137.38    |
| N <sub>py</sub> -Ru-C <sub>t</sub>                                  | 131.98    | 131.61    | 129.24    |
| C <sub>t</sub> -Ru-Cl                                               | 127.33    | 128.69    | 126.82    |
| <b>Torsion Angles (°)</b>                                           |           |           |           |
| N <sub>py</sub> -C <sub>5</sub> -C <sub>6</sub> -N <sub>amine</sub> | -30.36(8) | -17.71    | 27.34     |

**General procedure for the synthesis of pyridylamine (L2 – L8) ligands.** *N*-pyridylamine ligands **L2** – **L8** were synthesized by following the previously reported two step procedures.<sup>S12-</sup>

<sup>S16</sup> Typically, in Step-I, condensation of pyridine-2-carboxaldehyde (1 equiv.) and corresponding

amine (1.0 ~ 10.0 equiv.) in THF (20 mL) at room temperature was carried out for 24 h. The progress of the reaction was monitored by TLC (thin layer chromatography). After reaction completion, all the volatiles were removed under reduced pressure and product obtained was analysed by  $^1\text{H}$  NMR and then used in next step. In the next step, the compound obtained from previous step was dissolved in methanol (20 mL) followed by addition of 0.946 g  $\text{NaBH}_4$  under ice-cold conditions. Then the reaction mixture was allowed to stir for 24 h at room temperature. Methanol was then removed under reduced pressure and the obtained crude product was extracted with dichloromethane and water to remove excess  $\text{NaBH}_4$ . Volatiles are removed under reduced pressure and analysed by  $^1\text{H}$  and  $^{13}\text{C}$  NMR and used without further purification.

**Table S5.** Effect of catalyst loading on catalytic transformation of LA to GVL.<sup>a</sup>

| Entry | Catalyst loading (mol%) | t (h) | Conv. (%) | GVL Sel./Yield <sup>b</sup> (%) | TOF (h <sup>-1</sup> ) |
|-------|-------------------------|-------|-----------|---------------------------------|------------------------|
| 1     | 0.25                    | 24    | 92        | 83/72                           | 15                     |
| 2     | 1.0                     | 6     | 98        | >99/94                          | 16                     |
| 3     | 2.5                     | 2     | >99       | >99/95                          | 20                     |

<sup>a</sup>Reaction condition: [Ru]-2 catalyst, LA (1 mmol), HCOOH (6 mmol), Et<sub>3</sub>N (1 mmol), water (5 mL), 80 °C, 2 h. <sup>b</sup>Yield is calculated using maleic acid as an internal standard.

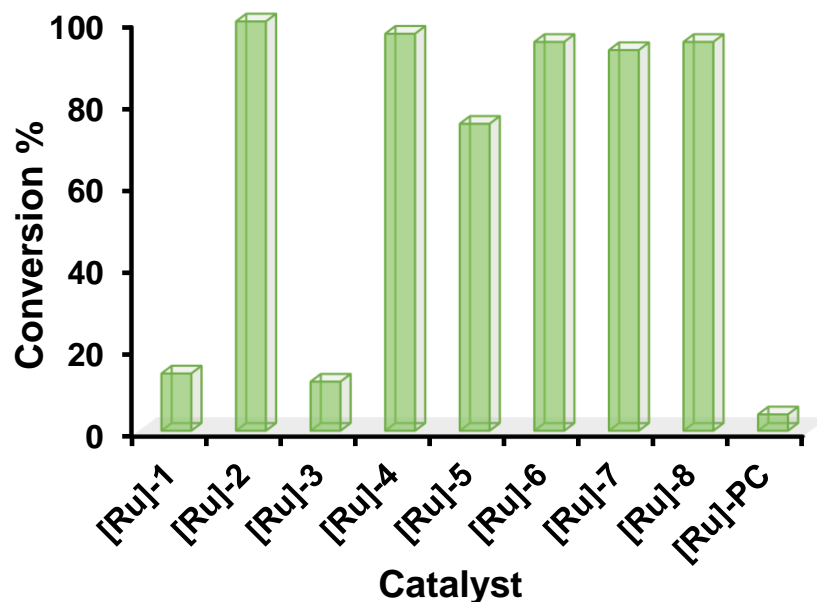

**Fig. S1** Comparative catalytic activity of ( $\eta^6$ -*p*-cymene)Ru(II)-pyridylamine complexes (**[Ru]-1** – **[Ru]-8**) for the transformation of LA to GVL. Reaction conditions: Ruthenium catalyst (2.5 mol%), LA (1 mmol), HCOOH (6 mmol), Et<sub>3</sub>N (1 mmol), water (5 mL), 80 °C, 2h.

**Table S6.** Effect of temperature on catalytic transformation of LA to GVL.<sup>a</sup>

| Entry | T (°C) | Conv. (%) | GVL Sel./Yield <sup>b</sup> (%) |
|-------|--------|-----------|---------------------------------|
| 2     | 70     | 10        | 72/6.5                          |
| 3     | 80     | 18        | 66/11                           |
| 4     | 90     | 26        | 77/19                           |
| 5     | 100    | 40        | 83/31                           |

<sup>a</sup>Reaction condition: **[Ru]-2** catalyst (2.5 mol%), LA (1 mmol), HCOOH (6 mmol), Et<sub>3</sub>N (1 mmol), water (5 mL), 15 min, 70-100 °C. <sup>b</sup>Yield is calculated using maleic acid as an internal standard.

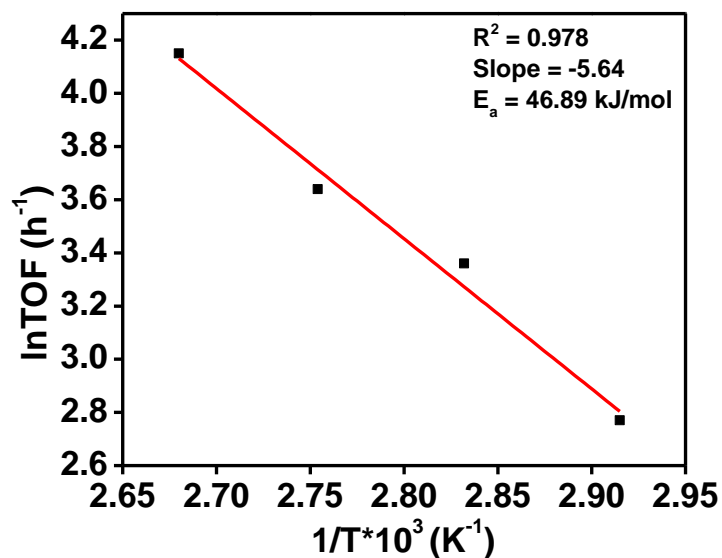

**Fig. S2** Arrhenius plot for the catalytic transformation of LA to GVL over **[Ru]-2**. (Based on the data shown in Table S5)

**Table S7.** Effect of various bases on catalytic transformation of LA to GVL.<sup>a</sup>

| Entry          | Base                           | Conv. (%) | GVL Sel./Yield <sup>b</sup> (%) |
|----------------|--------------------------------|-----------|---------------------------------|
| 1              | HCOONa                         | 94        | 97/86                           |
| 2              | NaOH                           | 92        | 93/77                           |
| 3              | NaHCO <sub>3</sub>             | 62        | 90/53                           |
| 4              | K <sub>3</sub> PO <sub>4</sub> | 83        | 94/76                           |
| 5              | Et <sub>3</sub> N              | >99       | >99/95                          |
| 6 <sup>c</sup> | -                              | 8         | 98/5                            |

<sup>a</sup>Reaction condition: **[Ru]-2** catalyst (2.5 mol%), LA (1 mmol), HCOOH (6 mmol), base (1 mmol), water (5 mL), 80 °C, 2 h. <sup>b</sup>Yield is calculated using maleic acid as an internal standard. <sup>c</sup>Reaction performed without base.

**Table S8.** Effect of reaction time on catalytic transformation of LA to GVL<sup>a</sup>

| Entry | t (h) | Conv. (%) | Sel. (%) |     |
|-------|-------|-----------|----------|-----|
|       |       |           | 4-HPA    | GVL |
| 1.    | 0.5   | 52        | 80       | 20  |
| 2.    | 1     | 80        | 70       | 30  |
| 3.    | 1.5   | 97        | 52       | 48  |
| 4.    | 2     | >99       | -        | >99 |

<sup>a</sup>Reaction condition: [Ru]-2 catalyst (2.5 mol%), LA (1 mmol), HCOOH (6 mmol), Et<sub>3</sub>N (1 mmol), water (5 mL), 80 °C, 0.5-2 h.

**Table S9.** Effect of pH on catalytic transformation of LA to GVL.<sup>a</sup>

| Entry | HCOOH (equiv.) | Et <sub>3</sub> N (equiv.) | pH  | Conv. (%) | Sel./Yield (%) |        |
|-------|----------------|----------------------------|-----|-----------|----------------|--------|
|       |                |                            |     |           | 4-HPA          | GVL    |
| 1     | 1              | 1                          | 6.1 | 35        | 43/9           | 57/16  |
| 2     | 3              | 1                          | 4.7 | 95        | 25/18          | 75/58  |
| 3     | 5              | 1                          | 3.6 | >99       | 16/11          | 84/72  |
| 4     | 6              | 1                          | 2.7 | >99       | -              | >99/85 |

<sup>a</sup>Reaction condition: [Ru]-2 (2.5 mol%), LA (1 mmol), HCOOH (1-6 mmol), Et<sub>3</sub>N (1 mmol), water (5 mL) 80 °C, 2 h.



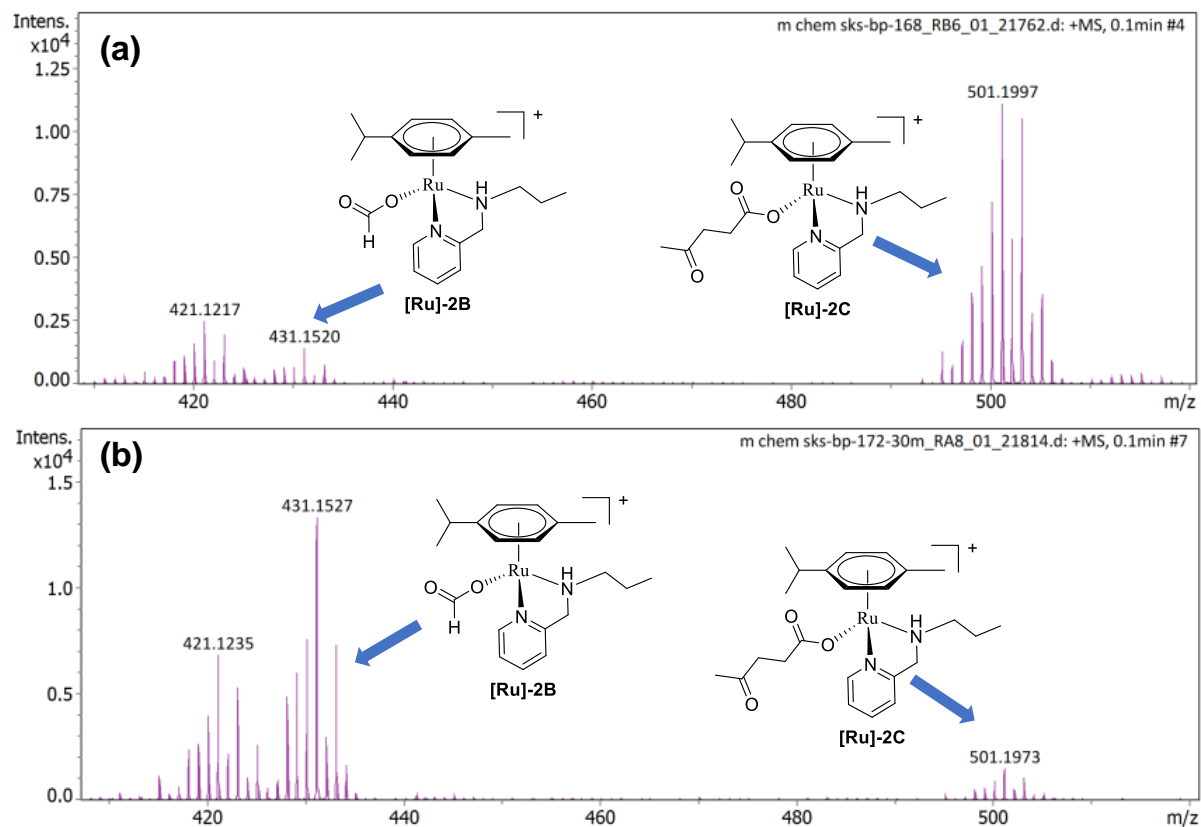

**Fig. S3** Observed mass data for Ru-formato ([Ru]-2B) and Ru-levulinate ([Ru]-2C) species for (a) 3:1 and (b) 6:1 HCOOH:Et<sub>3</sub>N after 1 h reaction time.

**Table S10.** Catalytic recyclability for the transformation of LA to GVL over [Ru]-2 complex.<sup>a</sup>

| Entry | Catalytic run   | Conv. (%) | Sel. (%) / Yield (%) |
|-------|-----------------|-----------|----------------------|
| 1     | 1 <sup>st</sup> | >99       | 99/85                |
| 2     | 2 <sup>nd</sup> | >99       | 99/85                |
| 3     | 3 <sup>rd</sup> | >99       | 99/84                |
| 4     | 4 <sup>th</sup> | 82        | 94/71                |
| 5     | 5 <sup>th</sup> | 74        | 81/53                |

<sup>a</sup>Reaction condition: [Ru]-2 catalyst (2.5 mol%), LA (1 mmol), HCOOH (6 mmol), Et<sub>3</sub>N (1 mmol), water (5 mL), 80 °C, 2 h.

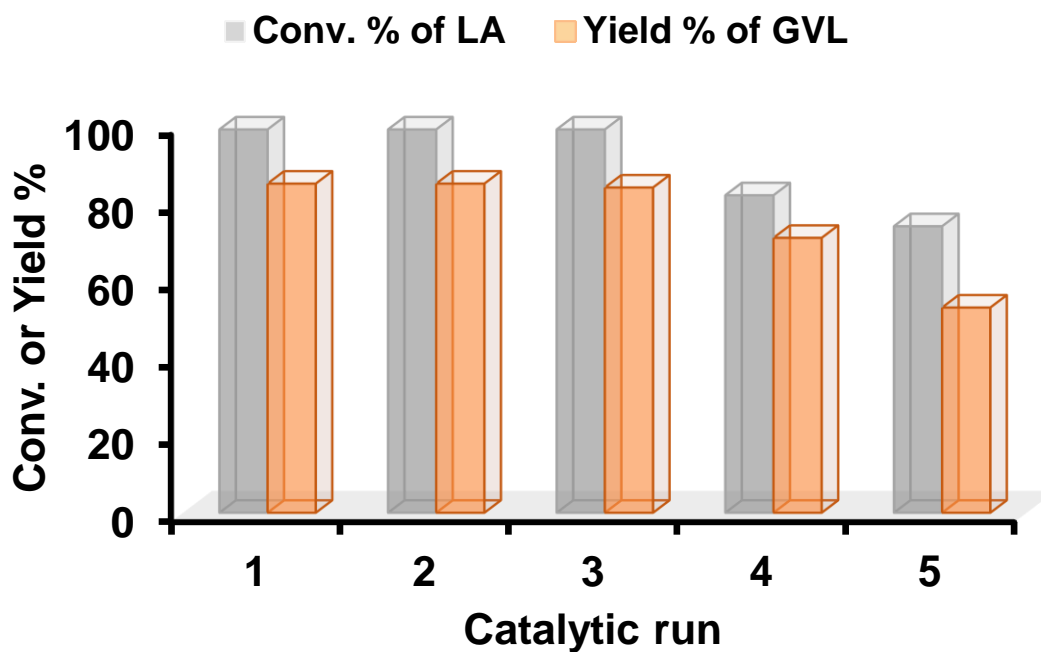

**Fig. S4** Catalytic recyclability for transformation of LA to GVL over **[Ru]-2** complex. Reaction conditions: **[Ru]-2** (2.5 mol%), LA (1 mmol), HCOOH (6 mmol), Et<sub>3</sub>N (1 mmol), water (5 mL).

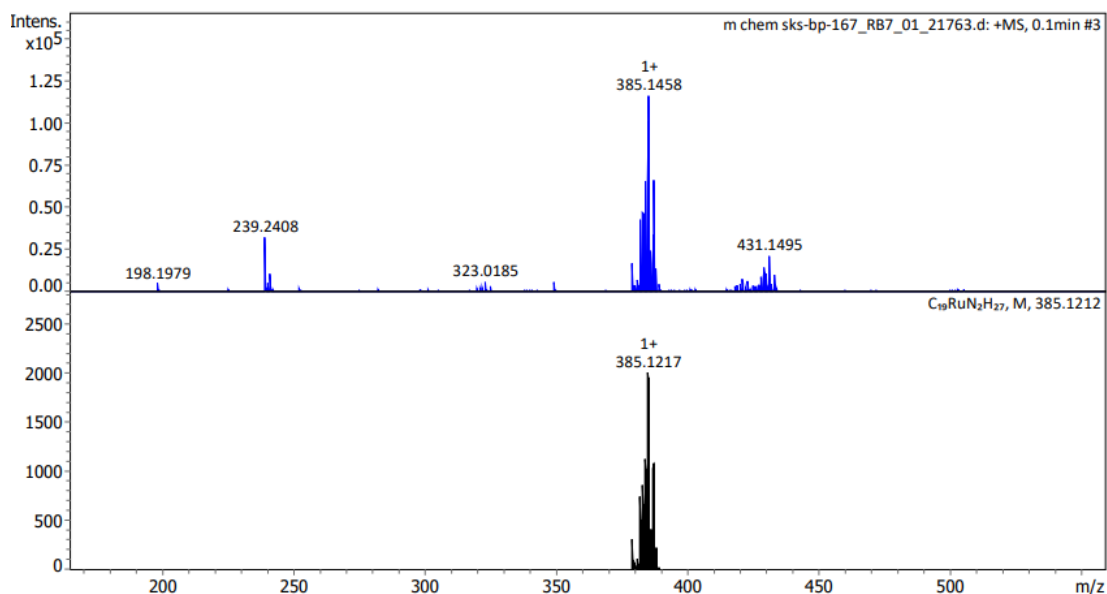

**Fig. S5** Observed and simulated pattern for **[Ru]-2** catalyst after reaction.

**Mass and NMR spectra of ( $\eta^6$ -p-cymene)Ru(II)-  
pyridylamine complexes [Ru]-1 – [Ru]-8**

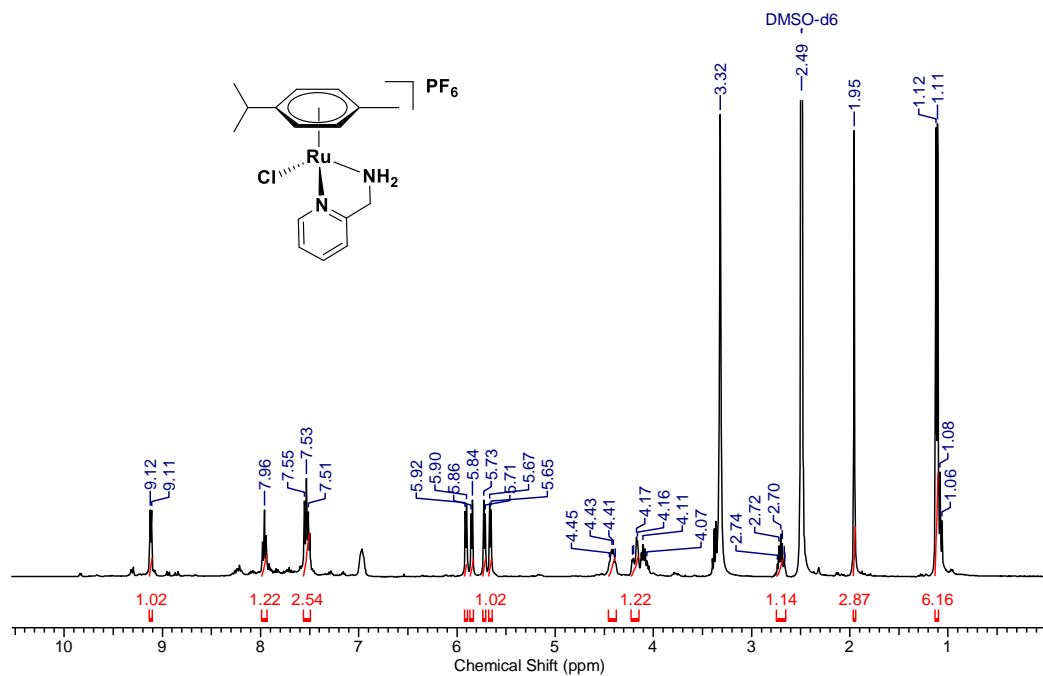

<sup>1</sup>H NMR spectrum of [Ru]-1 complex in DMSO-d<sub>6</sub>

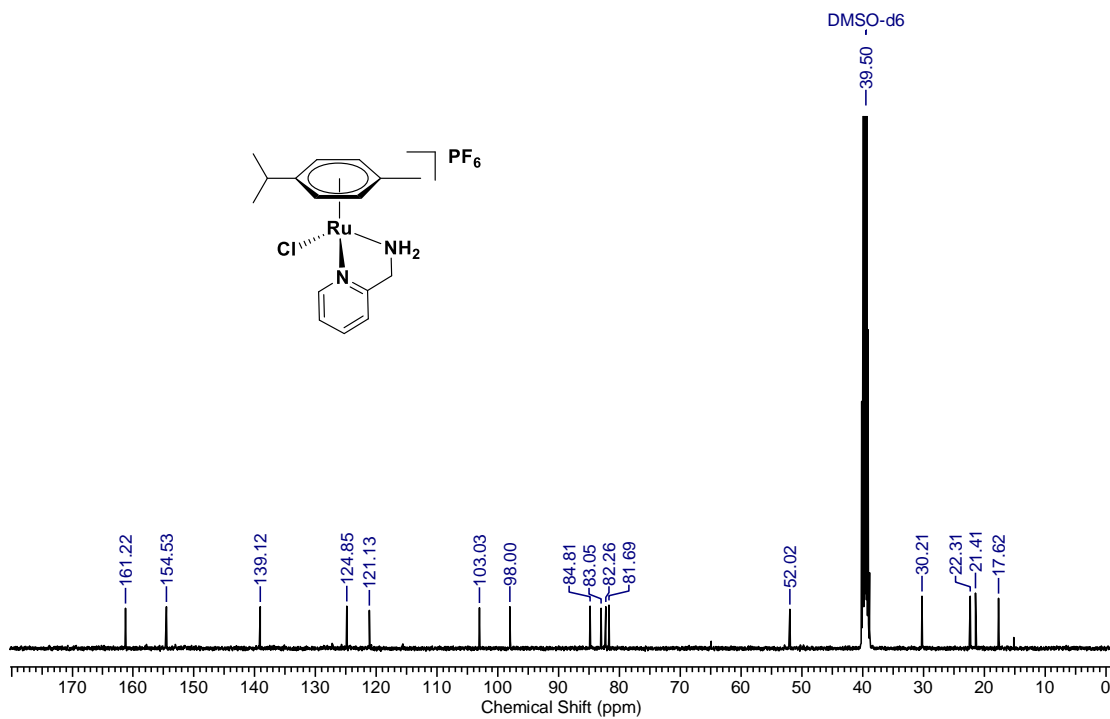

<sup>13</sup>C NMR spectrum of [Ru]-1 complex in DMSO-d<sub>6</sub>

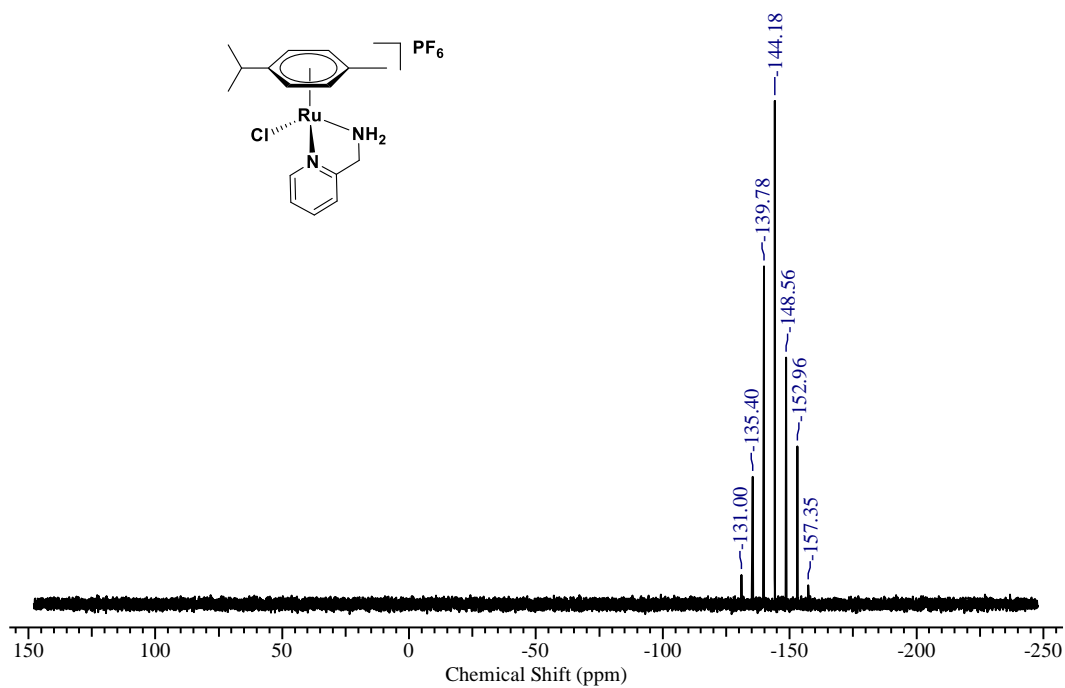

$^{31}\text{P}$  NMR spectrum of **[Ru]-1** complex in  $\text{DMSO-}d_6$

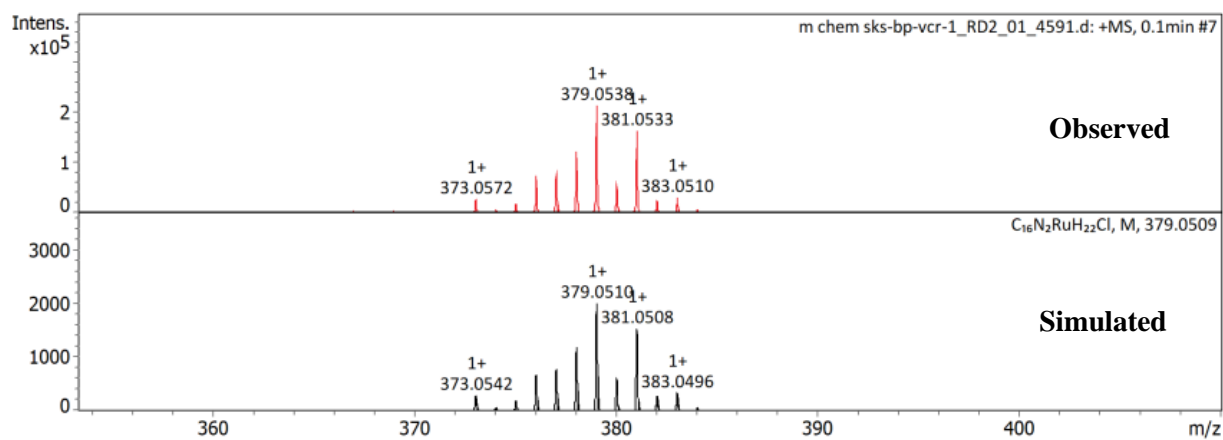

HR-MS of complex **[Ru]-1**

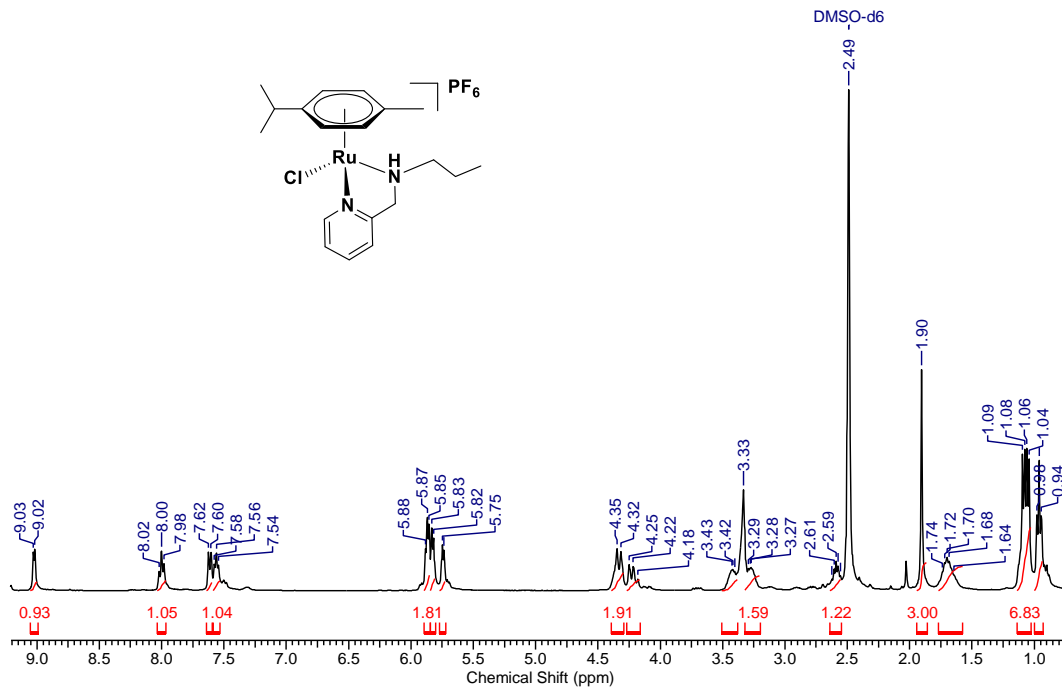

<sup>1</sup>H NMR spectrum of [Ru]-2 complex in DMSO-d<sub>6</sub>

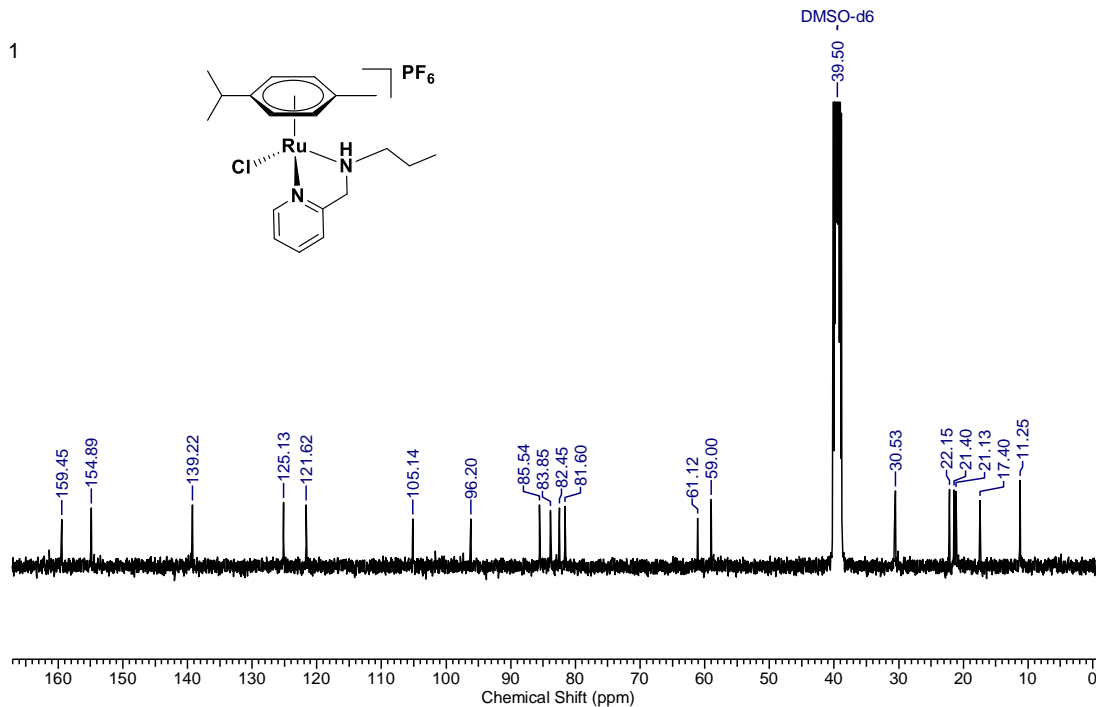

<sup>13</sup>C NMR spectrum of [Ru]-2 complex in DMSO-d<sub>6</sub>

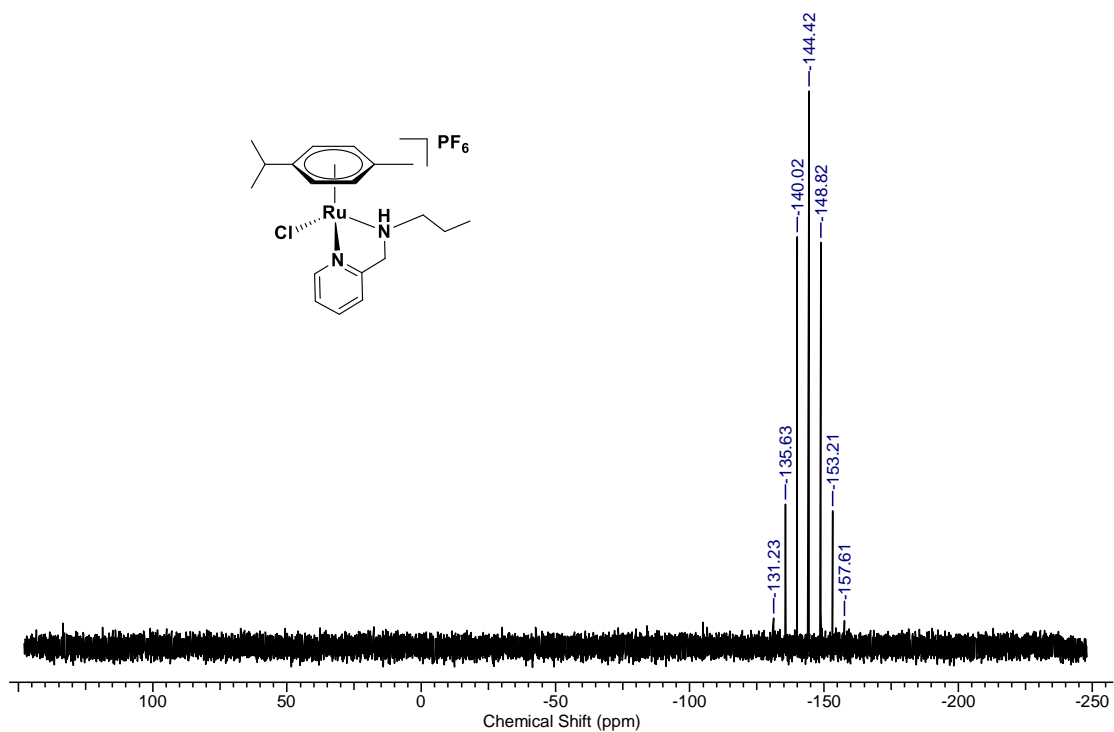

$^{31}\text{P}$  NMR spectrum of [Ru]-2 complex in DMSO- $d_6$

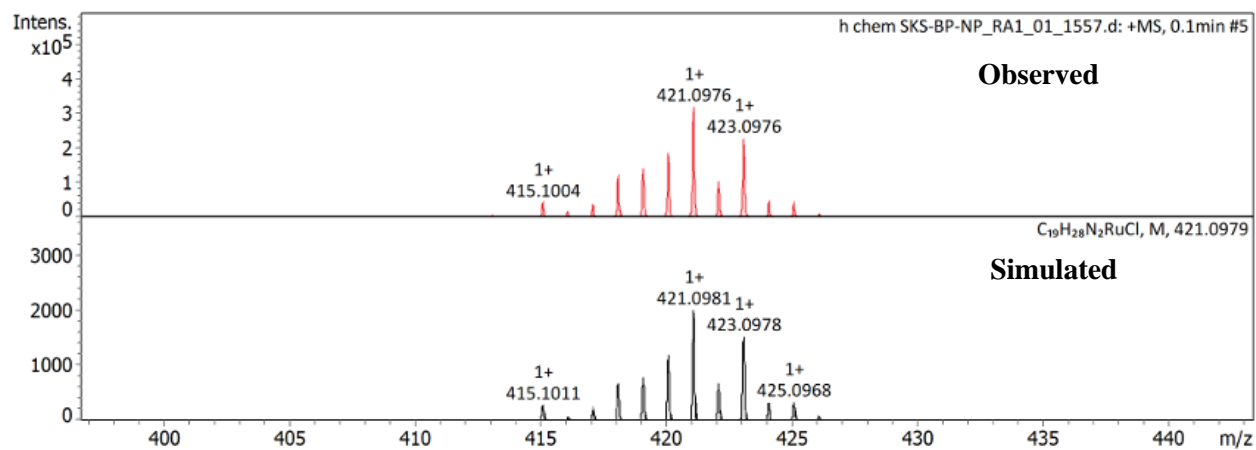

HR-MS of complex [Ru]-2

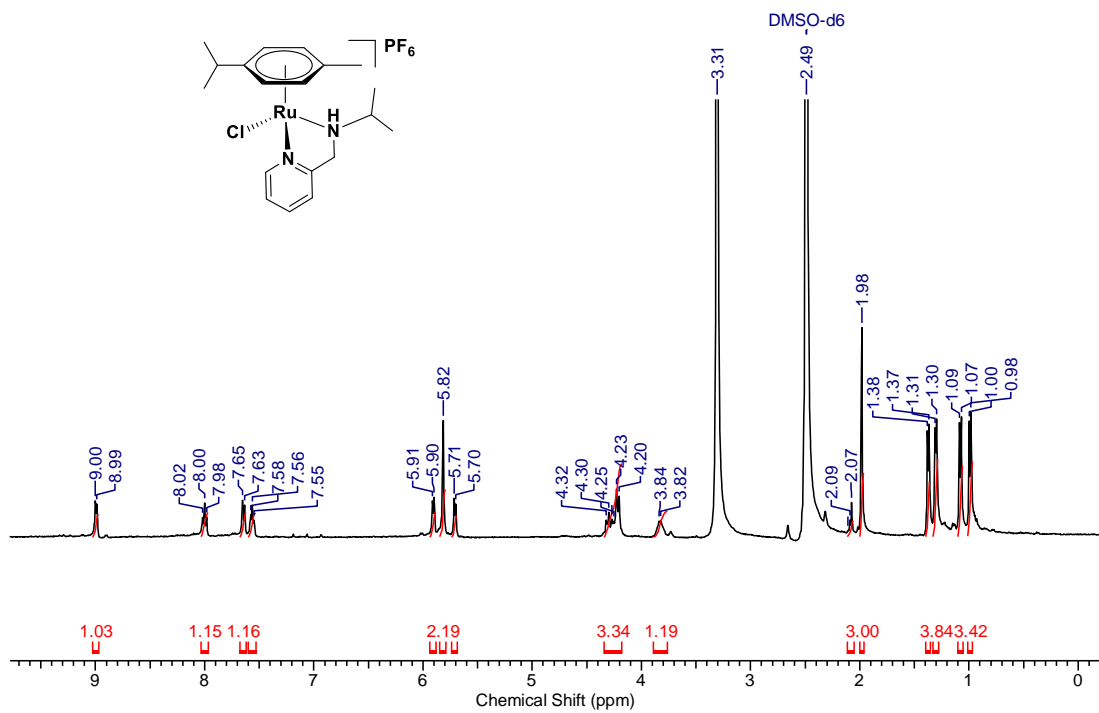

$^1\text{H}$  NMR spectrum of [Ru]-3 complex in  $\text{DMSO-}d_6$

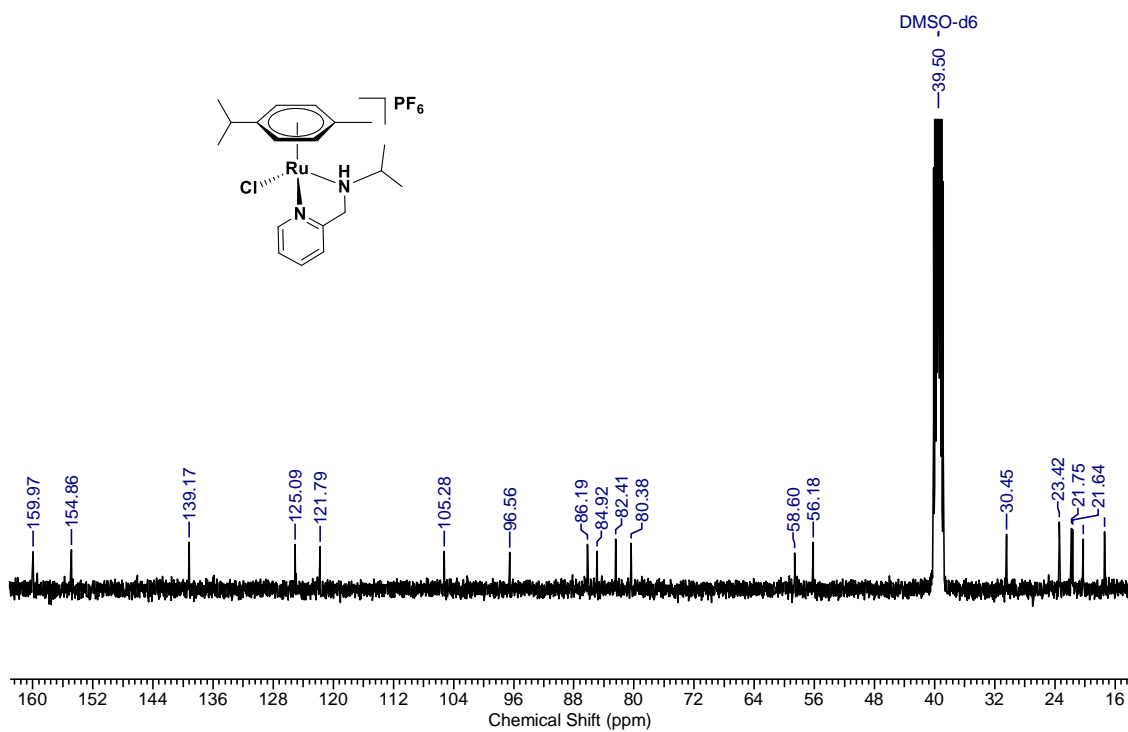

$^{13}\text{C}$  NMR spectrum of [Ru]-3 complex in  $\text{DMSO-}d_6$



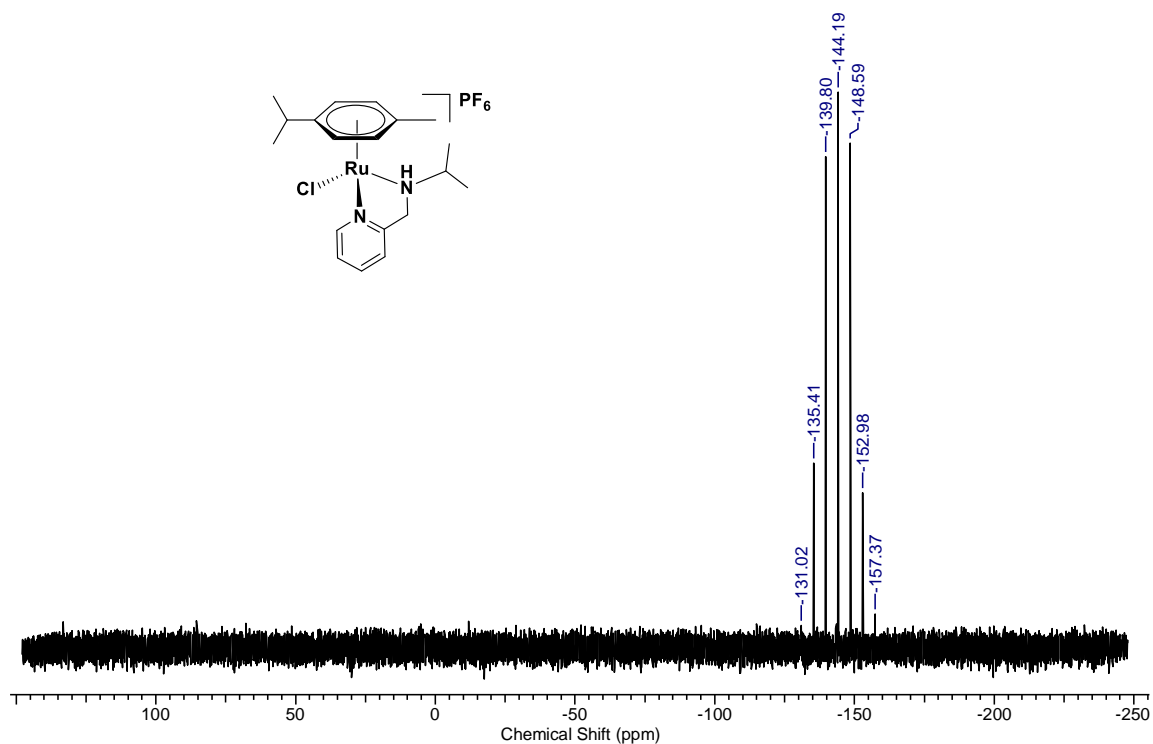

<sup>31</sup>P NMR spectrum of [Ru]-3 complex in DMSO-*d*<sub>6</sub>

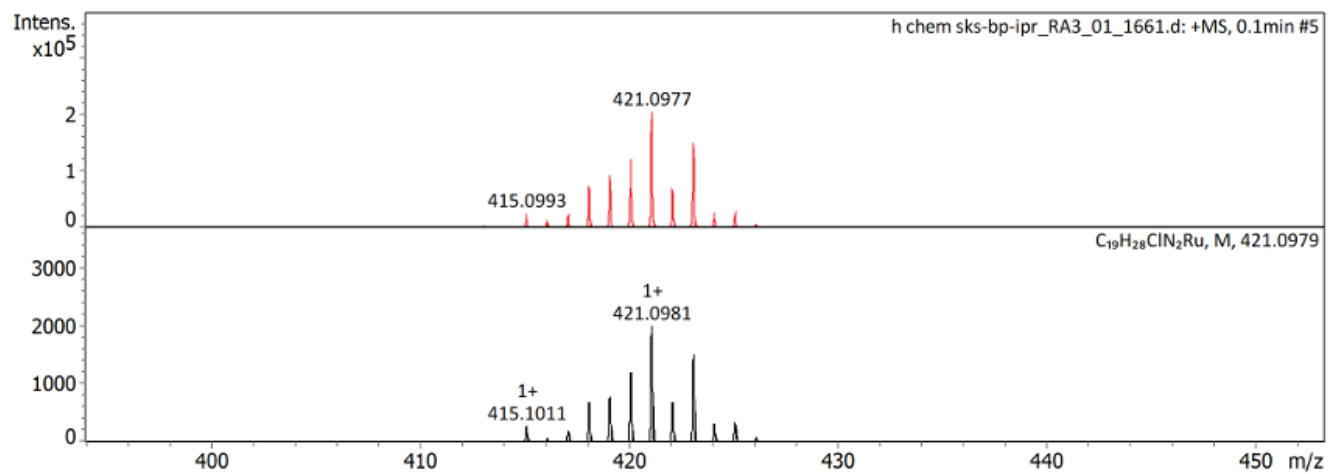

HR-MS of complex [Ru]-3

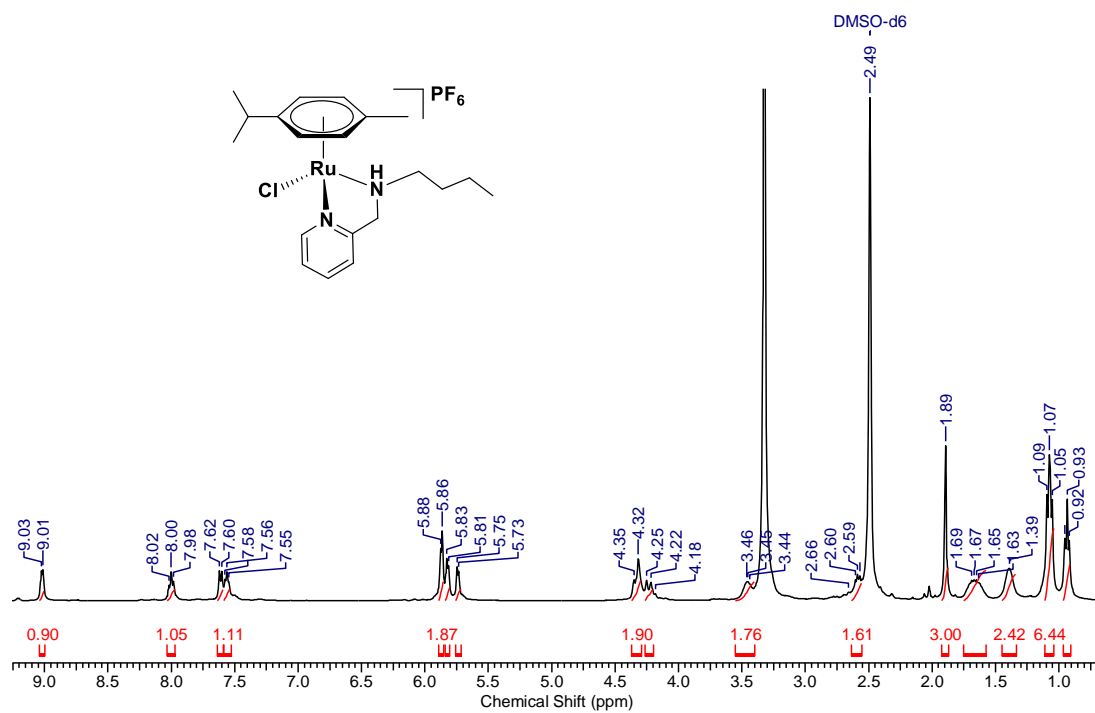

<sup>1</sup>H NMR spectrum of [Ru]-4 complex in DMSO-*d*<sub>6</sub>

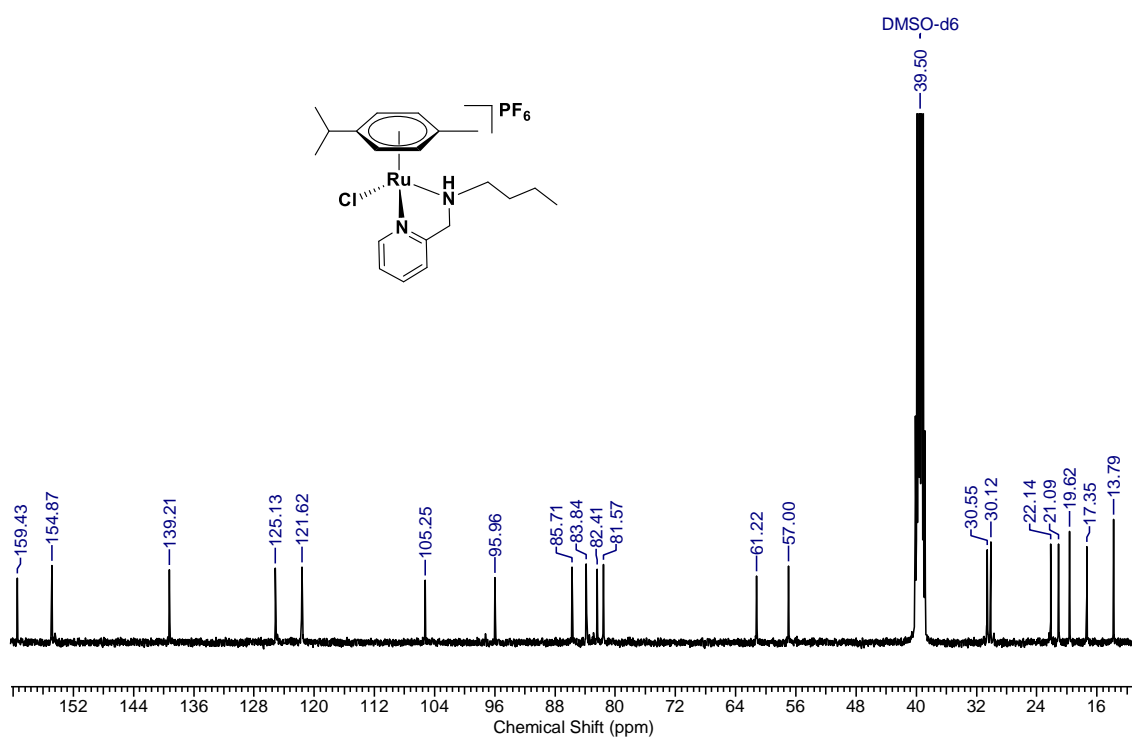

<sup>13</sup>C NMR spectrum of [Ru]-4 complex in DMSO-*d*<sub>6</sub>

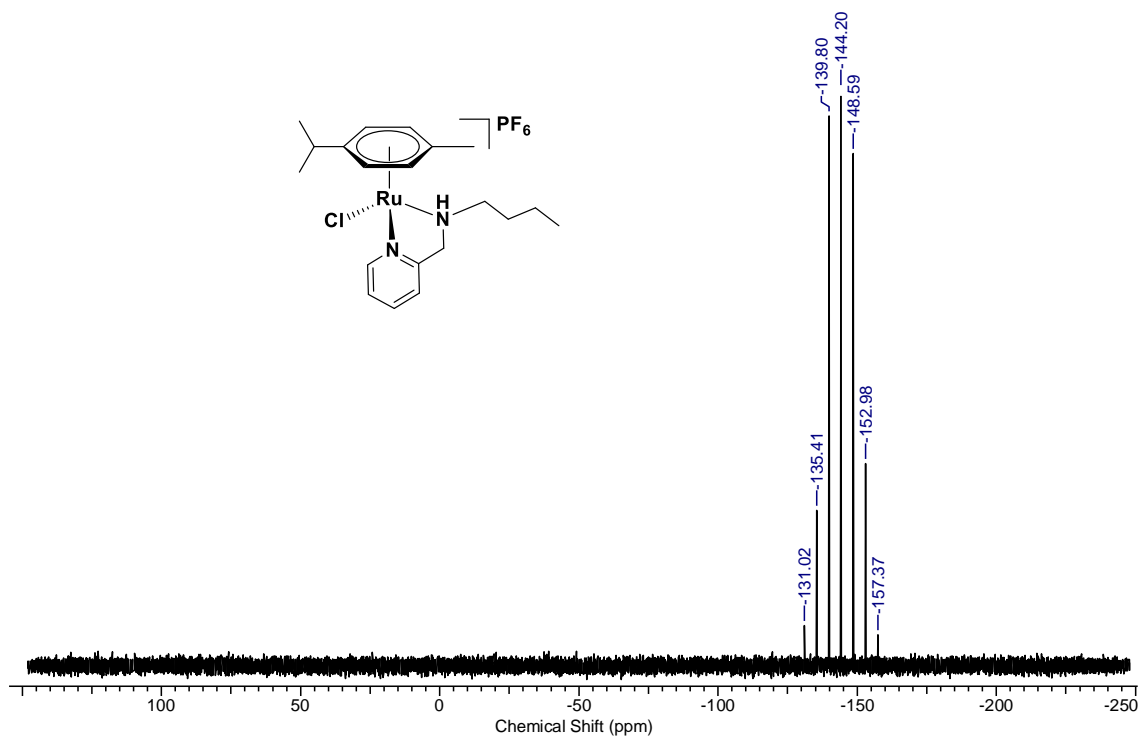

$^{31}\text{P}$  NMR spectrum of [Ru]-4 complex in  $\text{DMSO-}d_6$

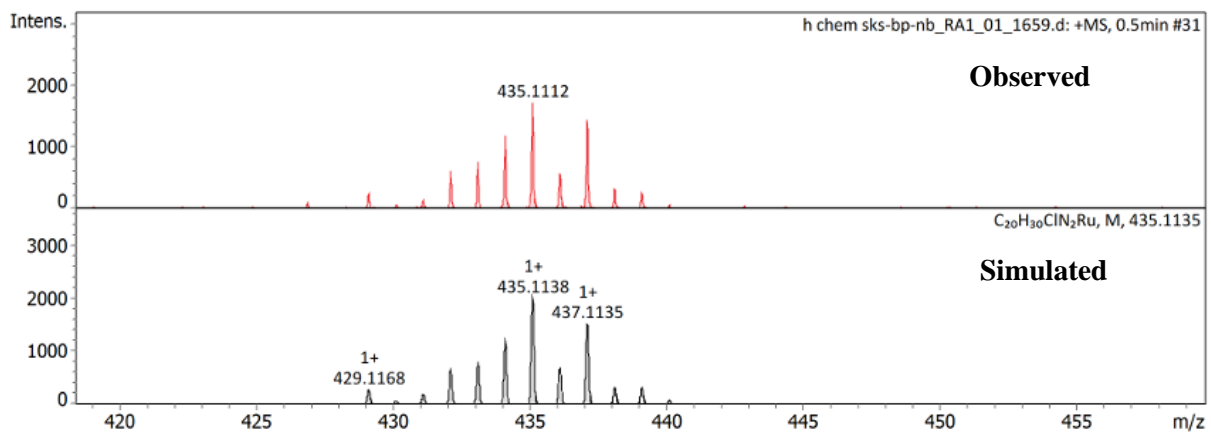

HR-MS of complex [Ru]-4

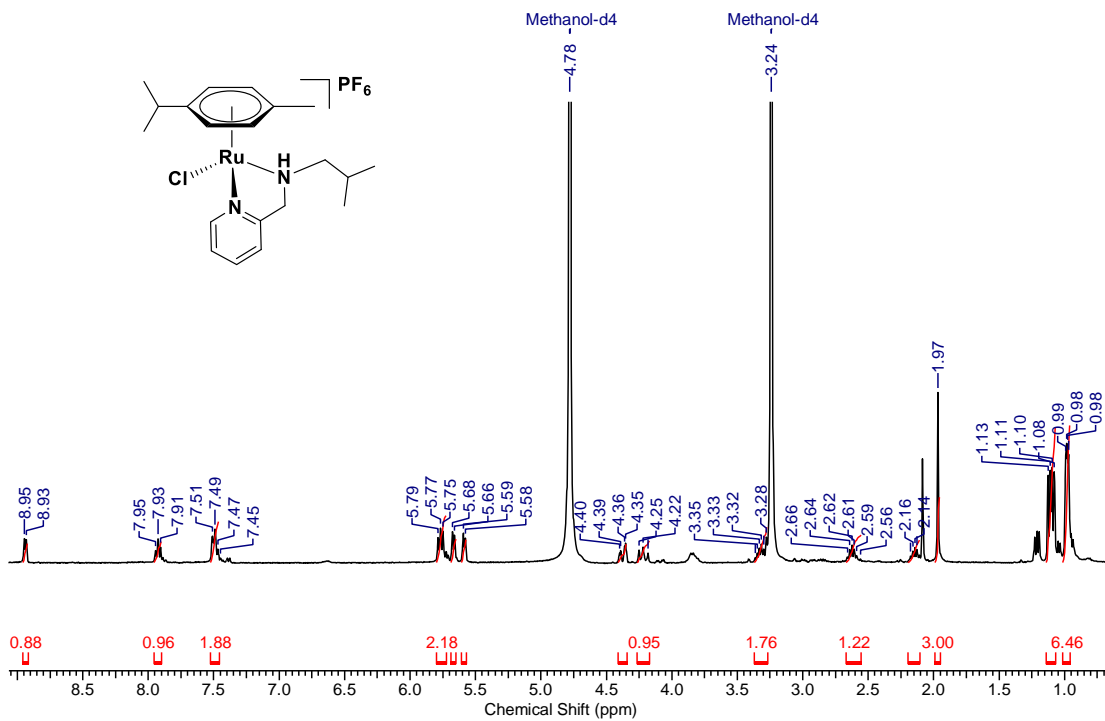

<sup>1</sup>H NMR spectrum of [Ru]-5 complex in methanol-*d*<sub>4</sub>

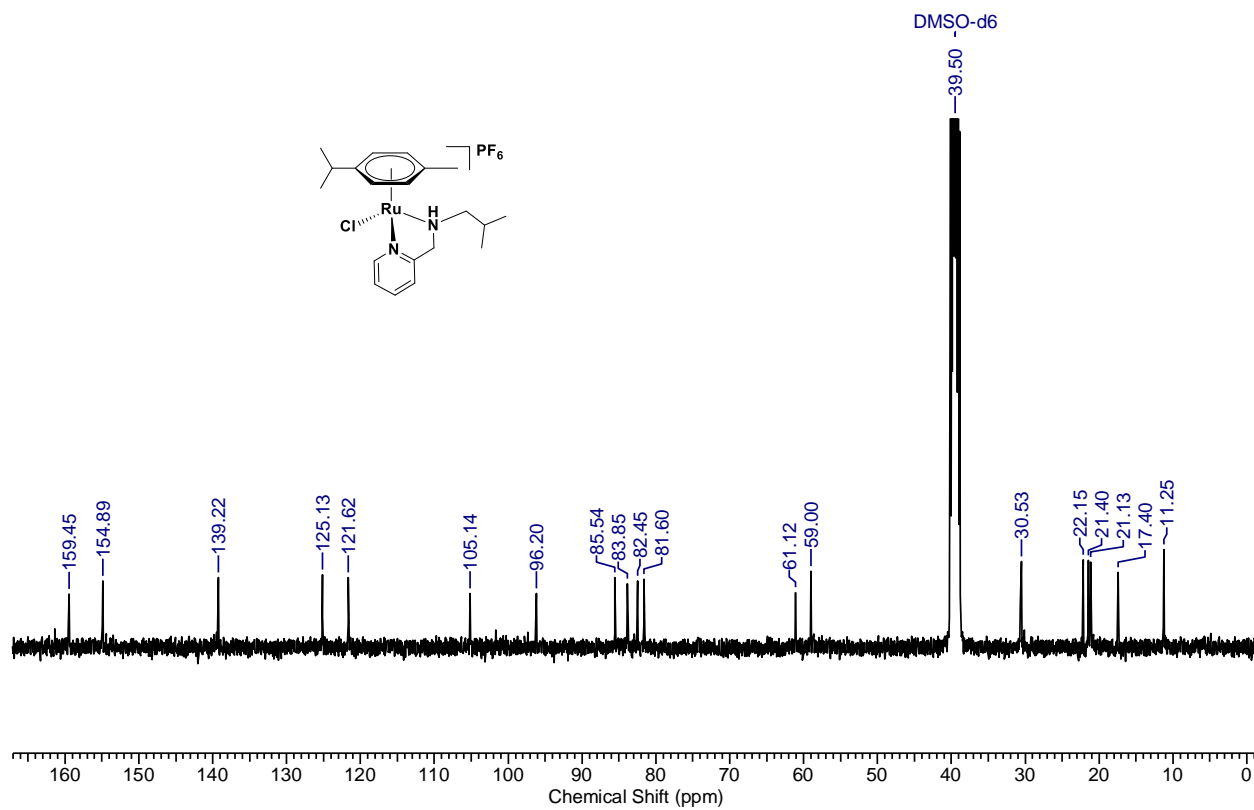

<sup>13</sup>C NMR spectrum of [Ru]-5 complex in dmsO-*d*<sub>6</sub>

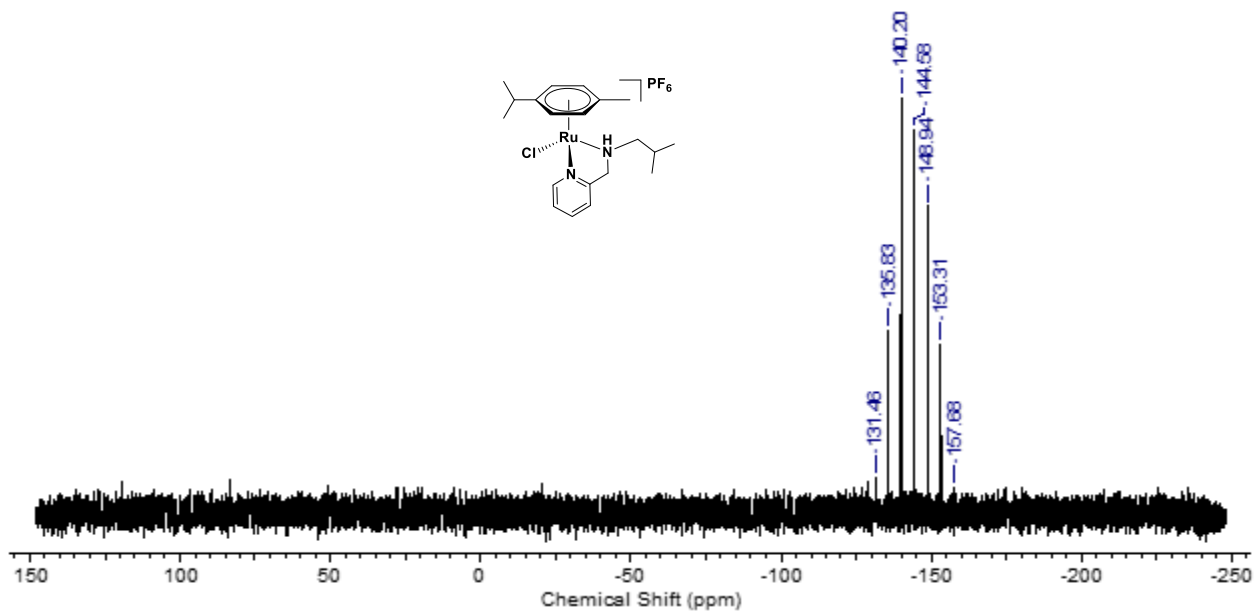

<sup>31</sup>P NMR spectrum of [Ru]-5 complex in methanol-*d*<sub>4</sub>

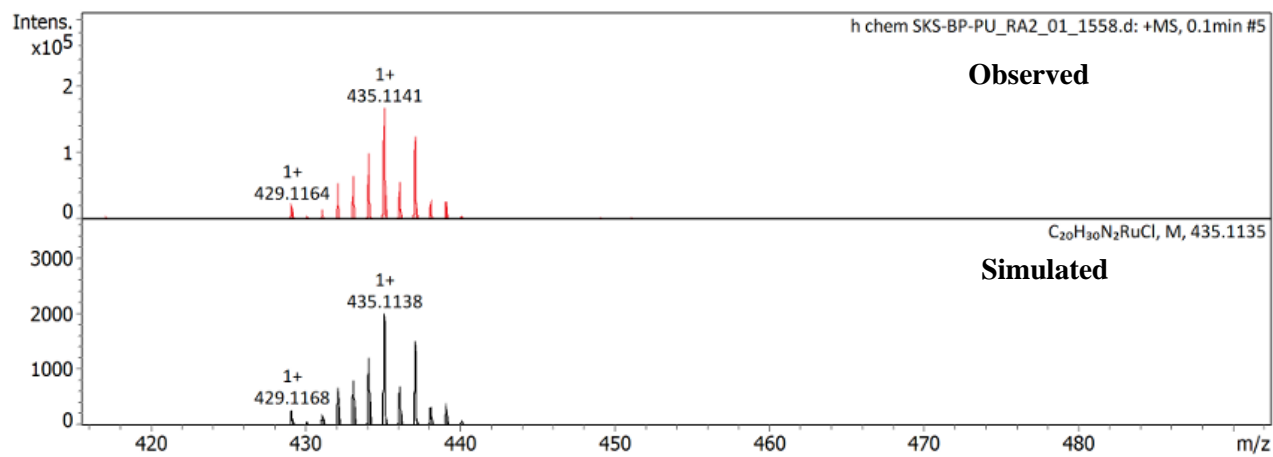

HR-MS of complex [Ru]-5

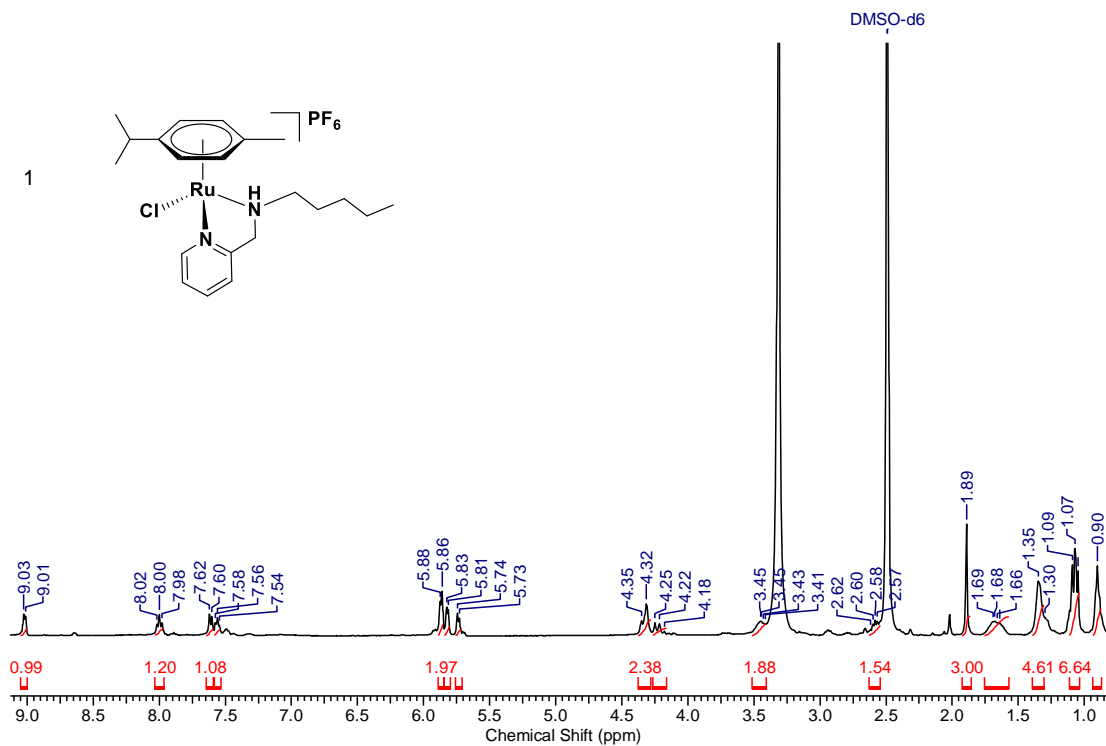

$^1\text{H}$  NMR spectrum of [Ru]-6 complex in  $\text{DMSO-}d_6$

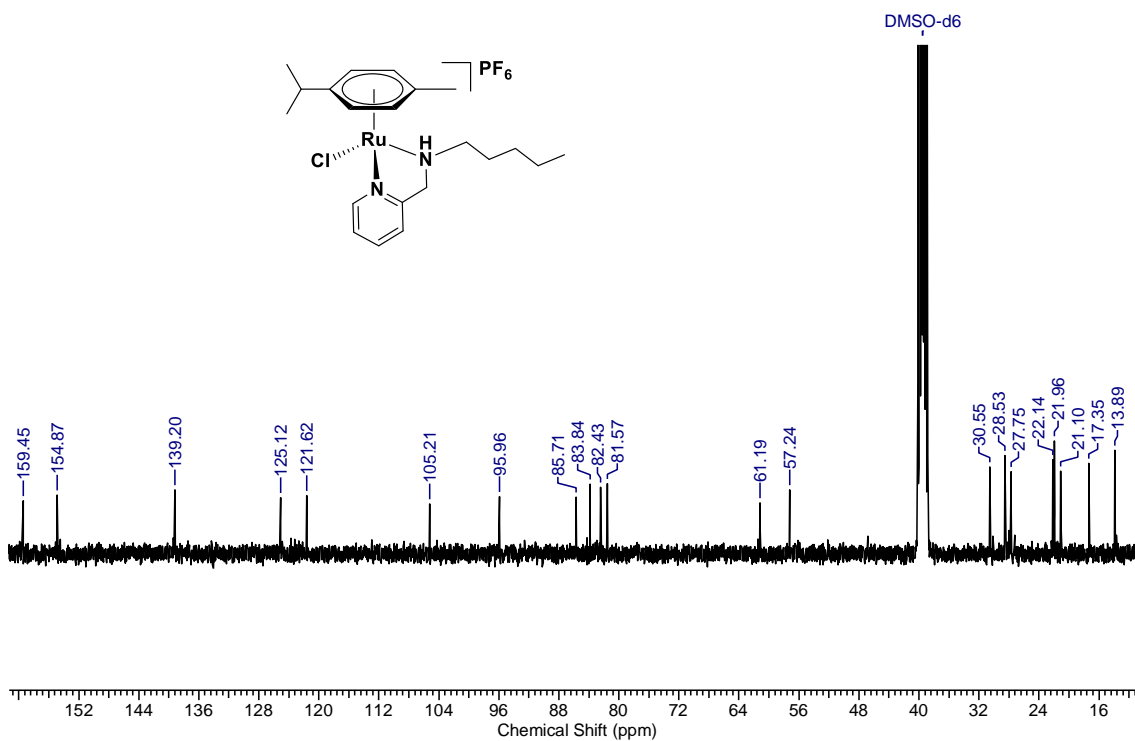

$^{13}\text{C}$  NMR spectrum of [Ru]-6 complex in  $\text{DMSO-}d_6$

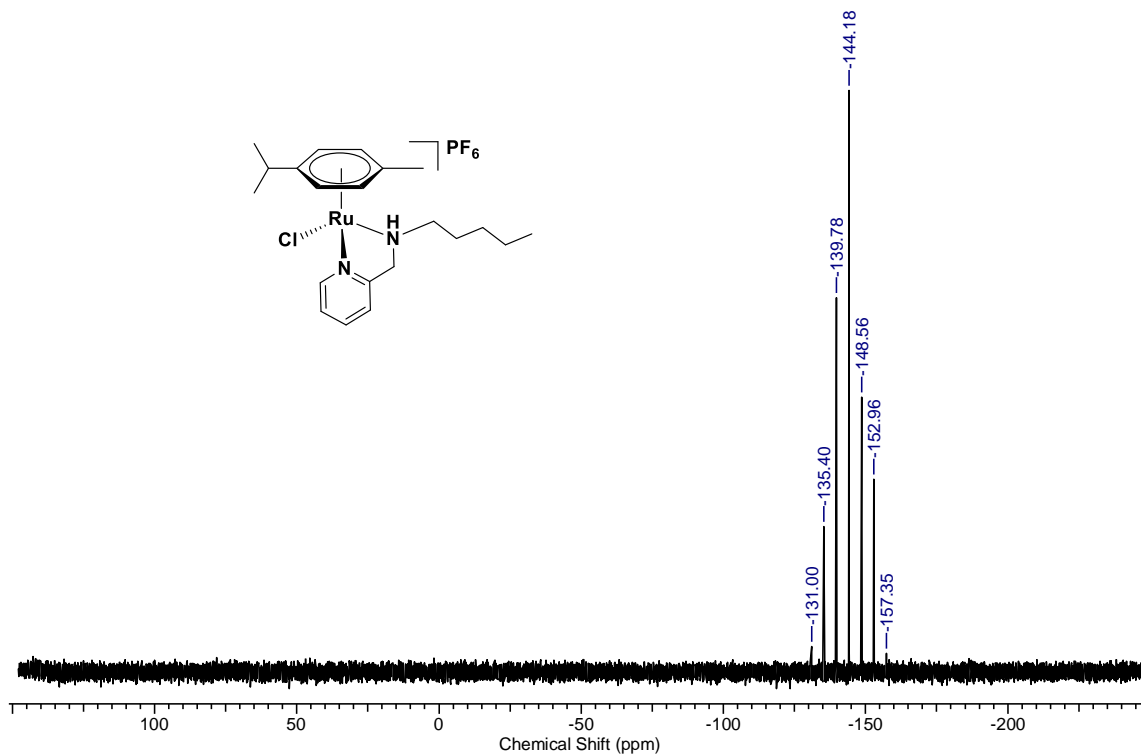

$^{31}\text{P}$  NMR spectrum of [Ru]-6 complex in  $\text{DMSO-}d_6$

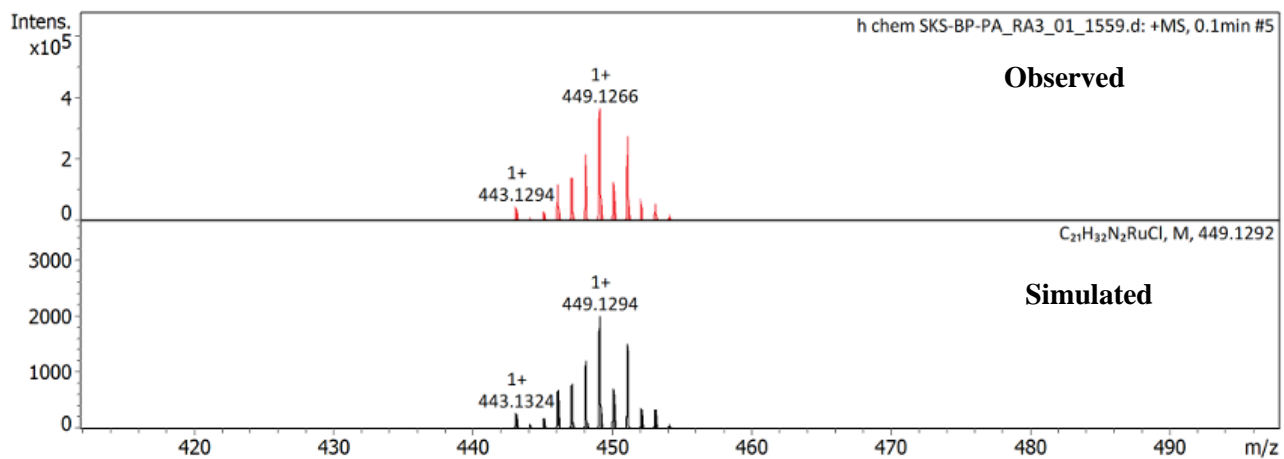

HR-MS of complex [Ru]-6

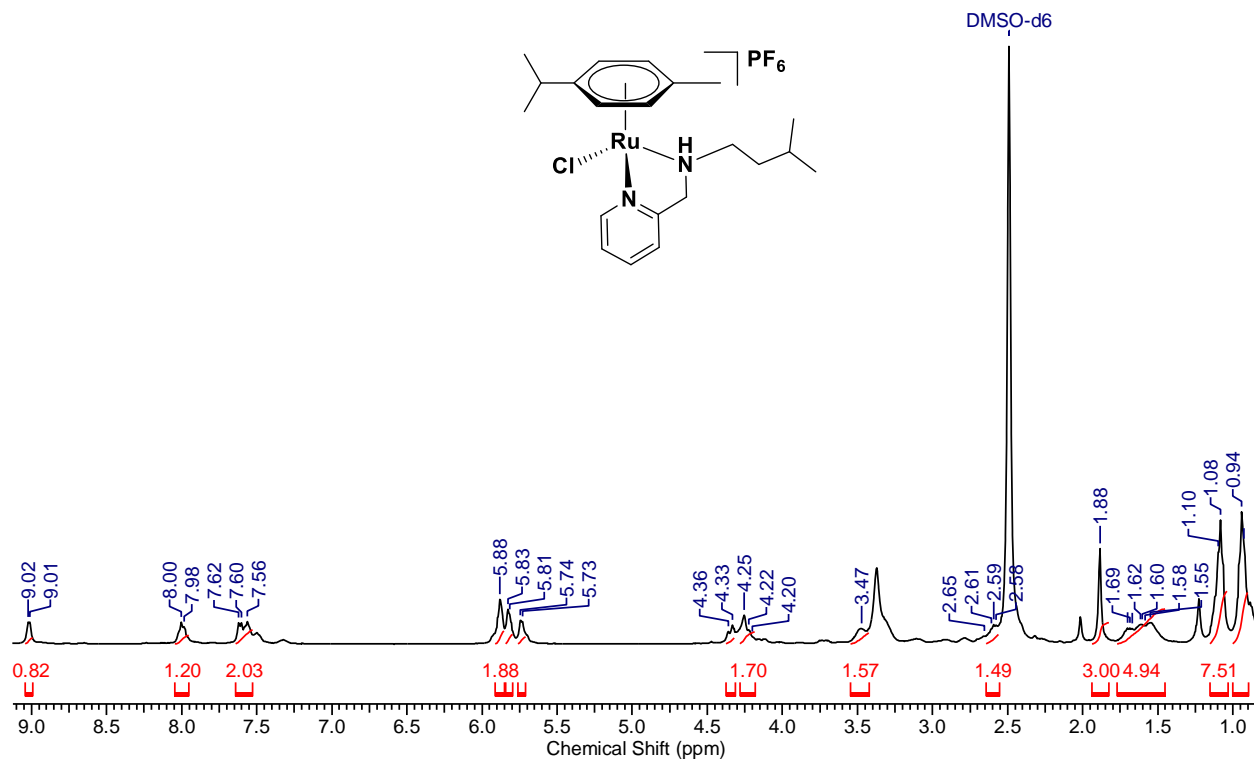

<sup>1</sup>H NMR spectrum of [Ru]-7 complex in DMSO-*d*<sub>6</sub>

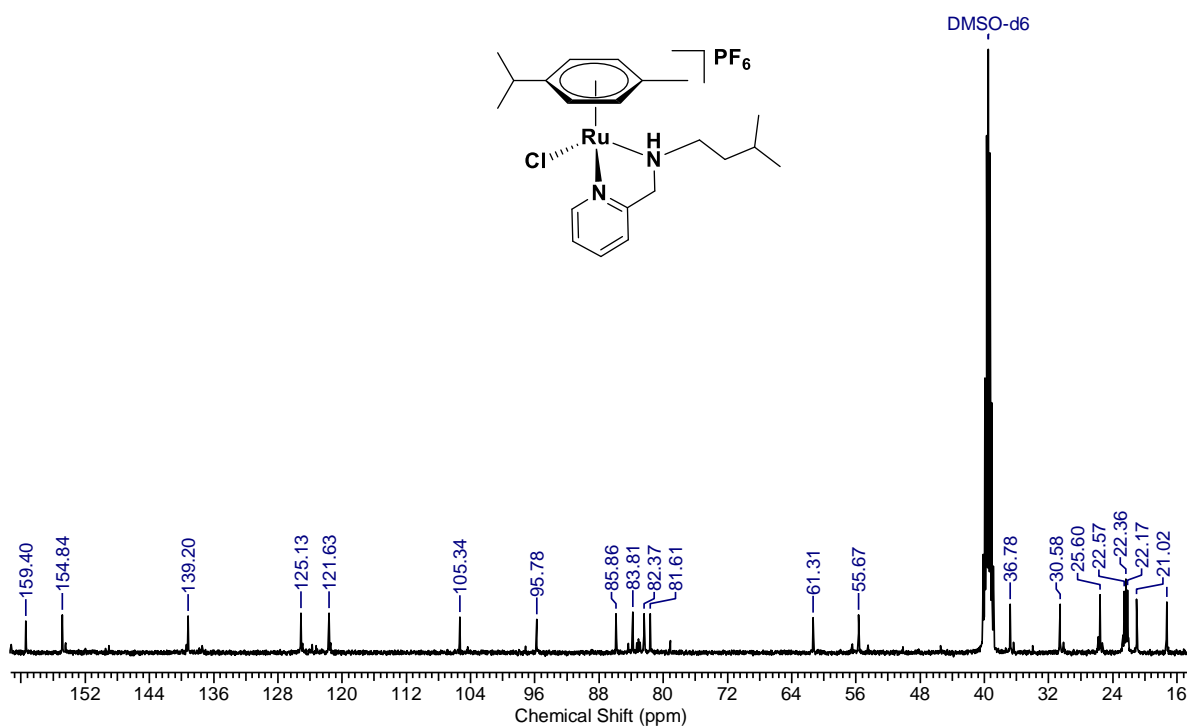

<sup>13</sup>C NMR spectrum of [Ru]-7 complex in DMSO-*d*<sub>6</sub>



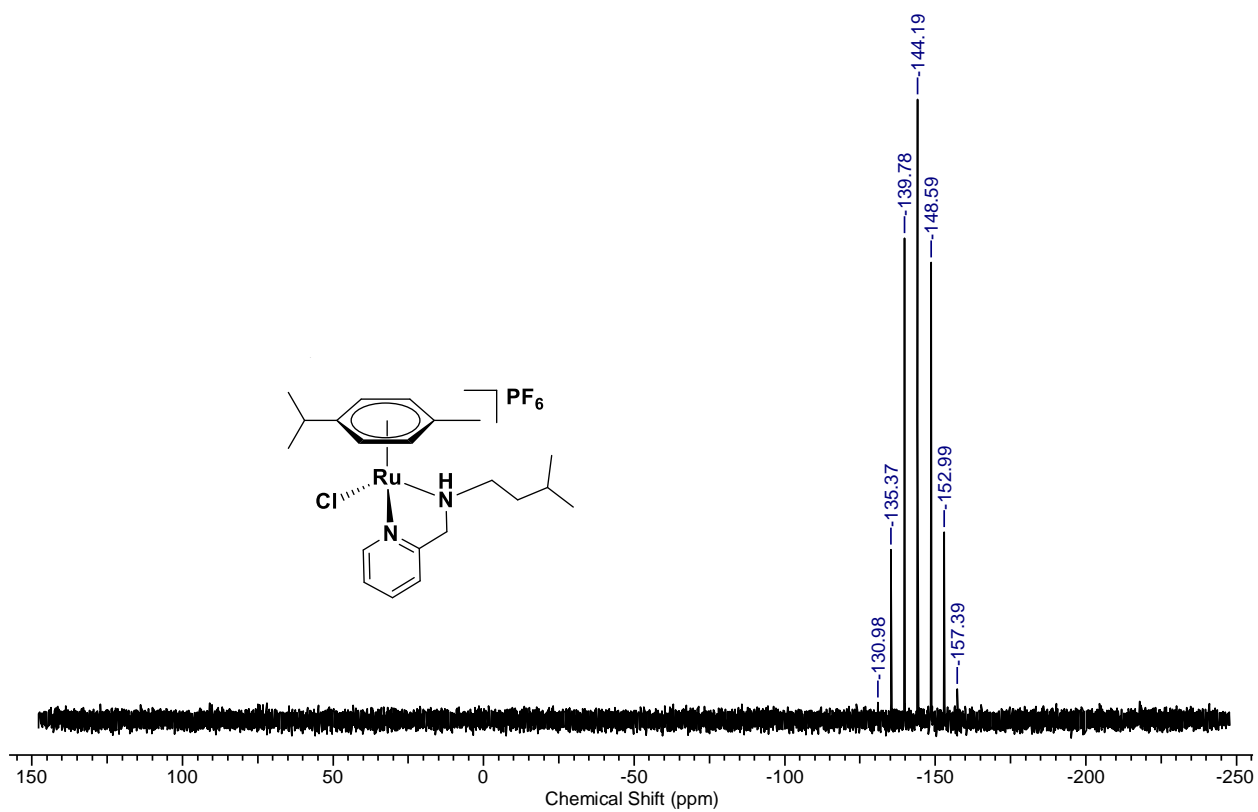

$^{31}\text{P}$  NMR spectrum of [Ru]-7 complex in  $\text{DMSO-}d_6$

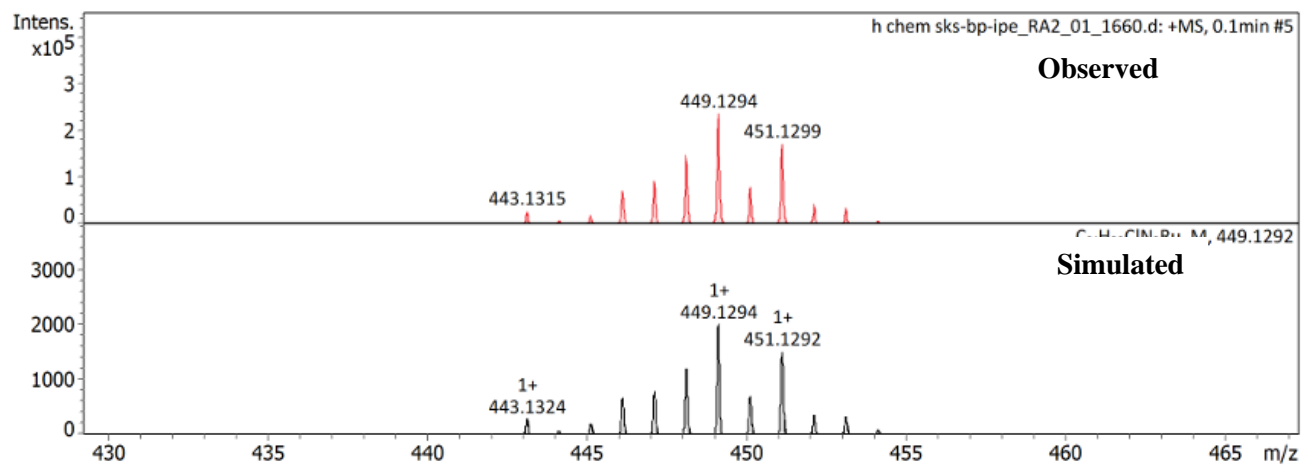

HR-MS of complex [Ru]-7

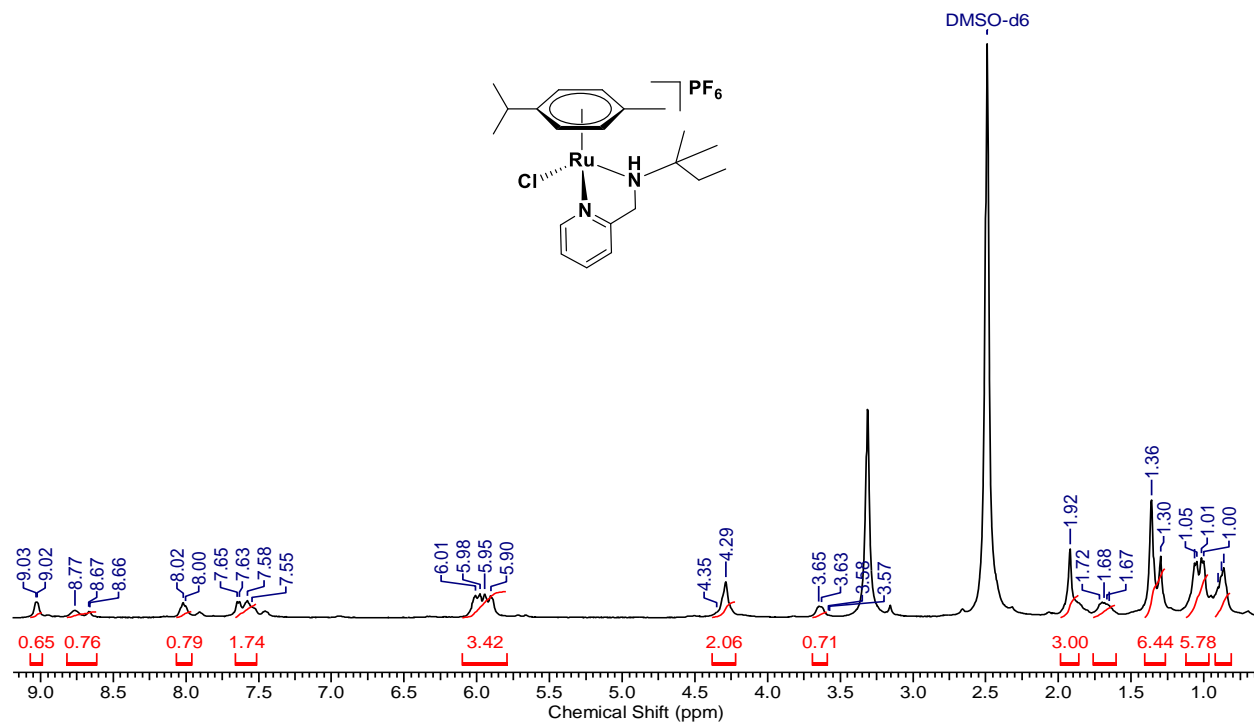

<sup>1</sup>H NMR spectrum of [Ru]-8 complex in DMSO-*d*<sub>6</sub>

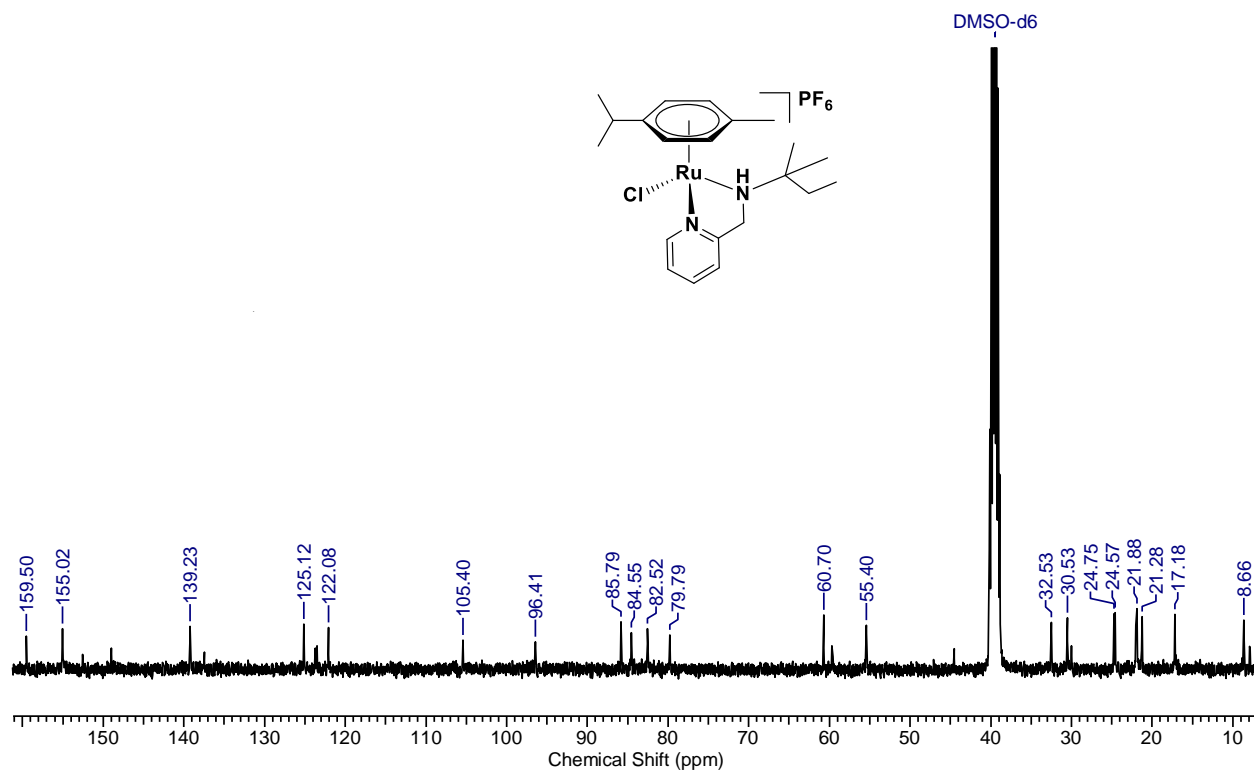

<sup>13</sup>C NMR spectrum of [Ru]-8 complex in DMSO-*d*<sub>6</sub>

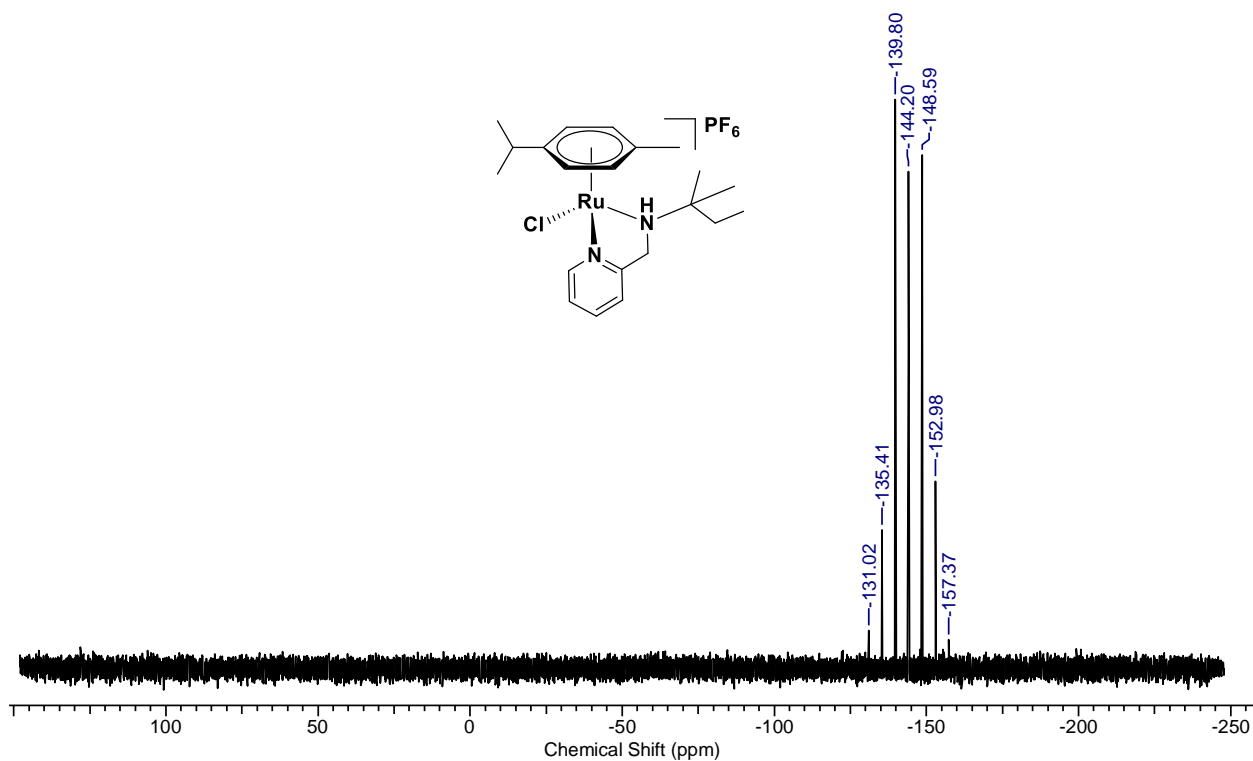

<sup>31</sup>P NMR spectrum of [Ru]-8 complex in DMSO-*d*<sub>6</sub>

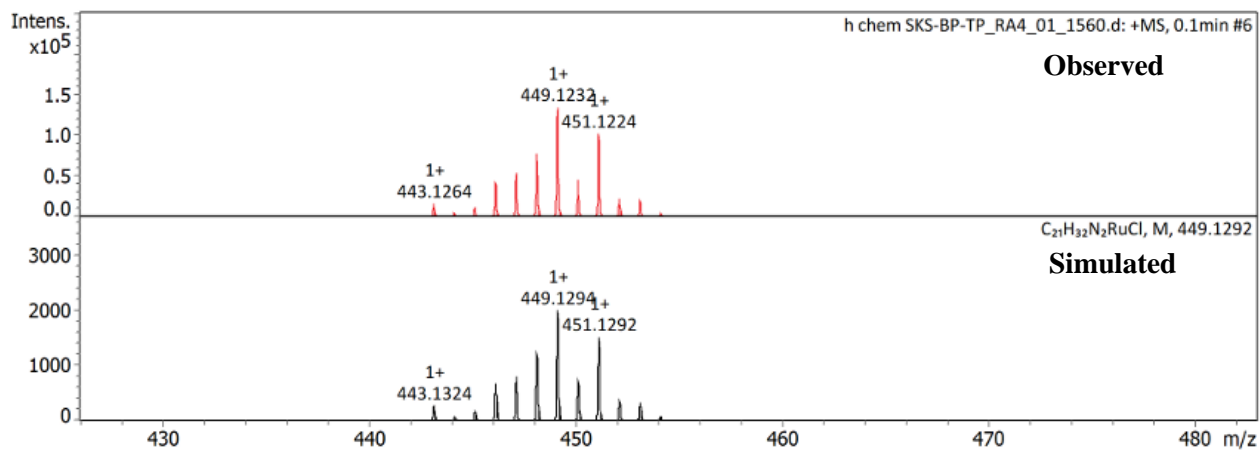

HR-MS of complex [Ru]-8

**Spectral data of  $\gamma$ -valerolactone from levulinic acid:**

**$\gamma$ -valerolactone (GVL):**  $^1\text{H}$  NMR (400 MHz,  $\text{CDCl}_3$ ):  $\delta$  (ppm) = 4.68-4.59 (m, 1H), 2.59-2.51 (t, 2H), 2.37-2.33 (m, 1H), 1.81-1.78 (m, 1H), 1.40-1.39 (d, 3H).  $^{13}\text{C}$  NMR (100 MHz,  $\text{CDCl}_3$ ):  $\delta$  (ppm) = 177.28, 116.14, 29.70, 29.08, 21.08.

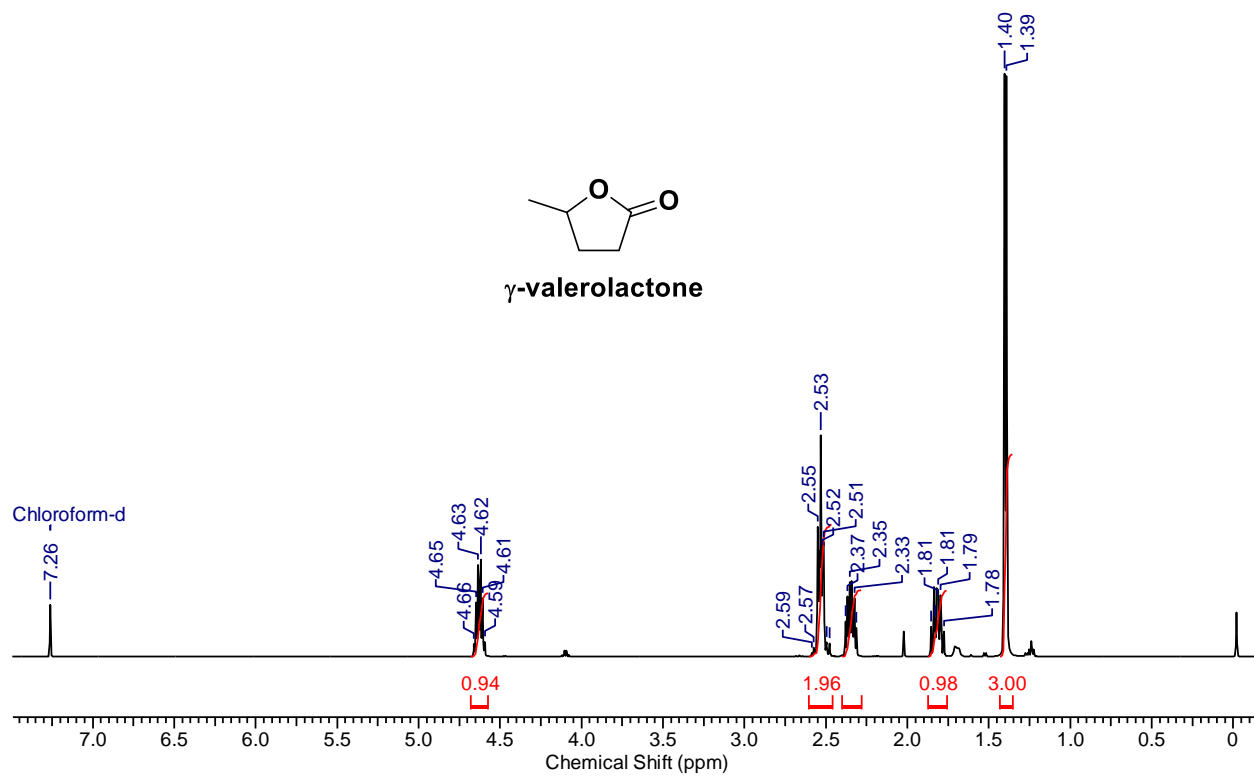

$^1\text{H}$  NMR spectrum of  $\gamma$ -valerolactone

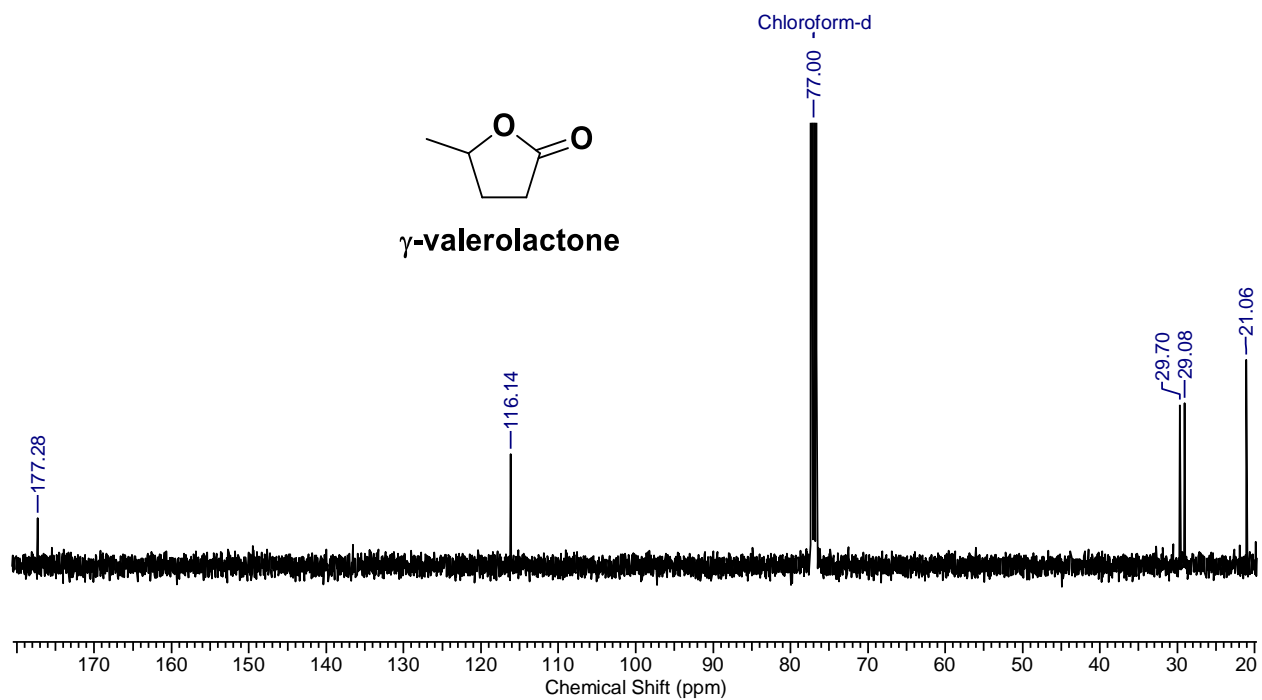

$^{13}\text{C}$  NMR spectrum of  $\gamma$ -valerolactone

## References

- S1 H. Mehdi, V. Fabos, R. Tuba, A. Bodor, L.T. Mika, I. T. Horvath, *Top. Catal.*, 2008, **48**, 49–54.
- S2 J. Deng, Y. Wang, T. Pan, Q. Xu, Q.-X. Guo, Y. Fu, *ChemSusChem*, 2013, **6**, 1163-1167.
- S3 A. D. Chowdhury, R. Jackstell, M. Beller, *ChemCatChem*, 2014, **6**, 3360–3365.
- S4 J. M. Tukacs, D. Kiraly, A. Stradi, G. Novodarszki, Z. Eke, G. Dibo, T. Kegl, L. T. Mika, *Green Chem.*, 2012, **14**, 2057–2059.
- S5 F. M. A. Geilen, B. Engendahl, M. Holscher, J. Klankermayer, W. Leitner, *J. Am. Chem. Soc.*, 2011, **133**, 14349–14358.
- S6 V. Fabos, L. T. Mika, I. T. Horvath, *Organometallics*, 2014, **33**, 181–187.
- S7 G. Amenuvor, B. C. E. Makhubela, J. Darkwa, *ACS Sustainable Chem. Eng.*, 2016, **4**, 6010–6018.
- S8 N. K. Oklu, B. C. E. Makhubela, *Inorg. Chimica Acta*, 2018, **482**, 460-468.
- S9 U. Omoruyi, S. J. Page, S. L. Apps, A. J. P. White, N. J. Long, P. W. Miller, *J. Organomet. Chem.*, **2021**, 935, 121650-121662.
- S10 G. Amenuvor, C. K. Rono, J. Darkwa, B. C. E. Makhubela, *Eur. J. Inorg. Chem.*, 2019, **36**, 3942-3953.
- S11 C. A. M. R. Slagmaat, M. A. F. Delgove, J. Stouten, L. Morick, Y. Meer, K. V. Bernaerts, S. M. A. D. Wildeman, *Green Chem.*, 2020, **22**, 2443-2458.
- S12 A. D. Dwivedi, V. K. Sahu, S. M. Mobin, S. K. Singh, *Inorg. Chem.*, 2018, **57**, 4777–4787.
- S13 Y. -C. Lin, K. -H. Yu, S. -L. Huang, Y. -H. Liu, Y. Wang, S. -T. Liu, J. -T. Chen, *Dalton Trans.*, 2009, 9058-9067.
- S14 M. Carmona, R. Rodriguez, I. Mendez, V. Passarelli, F. J. Lahoz, P. Garcia-Orduna, D. Carmona, *Dalton Trans.*, 2017, **46**, 7332-7350.
- S15 P. Govindaswamy, Y. A. Mozharivskyj, M. R. Kollipara, *Polyhedron*, 2004, **23**, 1567-1572.
- S16 M. K. Awasthi, S. K. Singh, *Inorg. Chem.*, 2019, **58**, 14912–14923.
